# Supplementary material for: Activating Point Mutations in the MET Kinase Domain Represent a Unique Molecular Subset of Lung Cancer and Other Malignancies Targetable with MET Inhibitors
Source: PubMed Central journal article supplement — Cancer Discov. 2024 Apr 2;14(8):1440–56. doi: 10.1158/2159-8290.CD-23-1217 (PMC11294820; doi:10.1158/2159-8290.cd-23-1217), 2024-04-02
Supplement: cd-23-1217_supplementary_figure_1_suppsf1.pdf [file cd-23-1217_supplementary_figure_1_suppsf1.pdf]

## Supplementary Figure 1

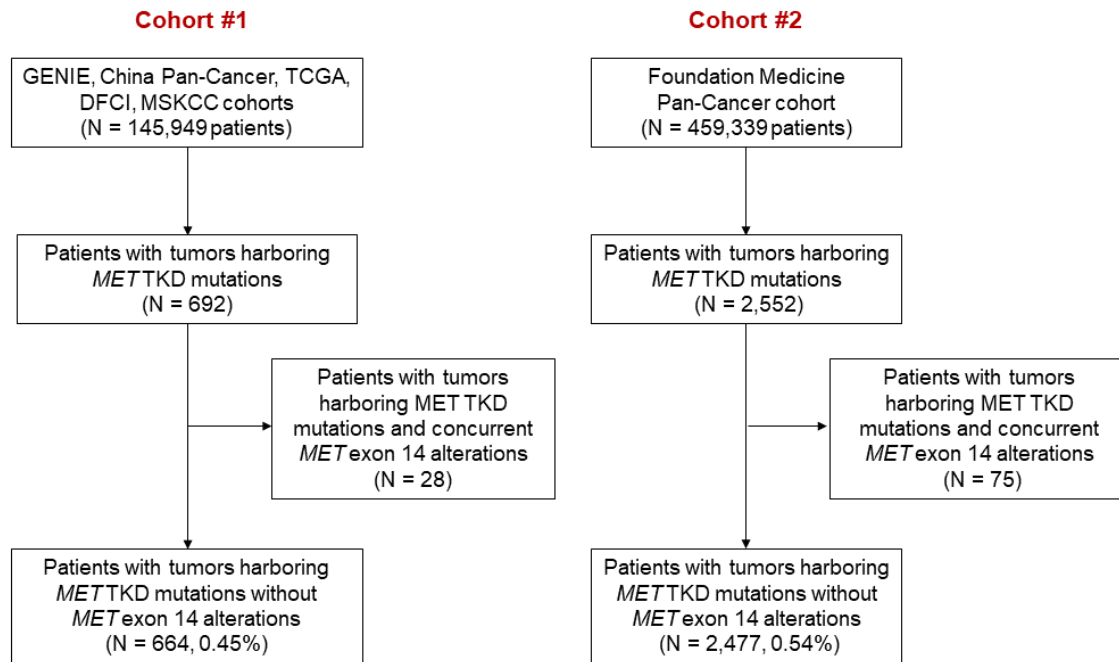

**Supplementary Figure 1. Study flowchart.** Cohort #1 (multi-institutional cohort): GENIE V.11.0, China Pan-cancer (OrigiMed2020, Nature 2022), The Cancer Genome Atlas (TCGA) Pan-Cancer Atlas studies, Dana-Farber Cancer Institute (DFCI) and NSCLC from Memorial Sloan Kettering Cancer Center (MSKCC); cohort #2: Foundation Medicine Pan-Cancer cohort.
