# Supplementary material for: Activating Point Mutations in the MET Kinase Domain Represent a Unique Molecular Subset of Lung Cancer and Other Malignancies Targetable with MET Inhibitors
Source: PubMed Central journal article supplement — Cancer Discov. 2024 Apr 2;14(8):1440–56. doi: 10.1158/2159-8290.CD-23-1217 (PMC11294820; doi:10.1158/2159-8290.cd-23-1217), 2024-04-02
Supplement: cd-23-1217_supplementary_figure_3_suppsf3.pdf [file cd-23-1217_supplementary_figure_3_suppsf3.pdf]

## Supplementary Figure 3

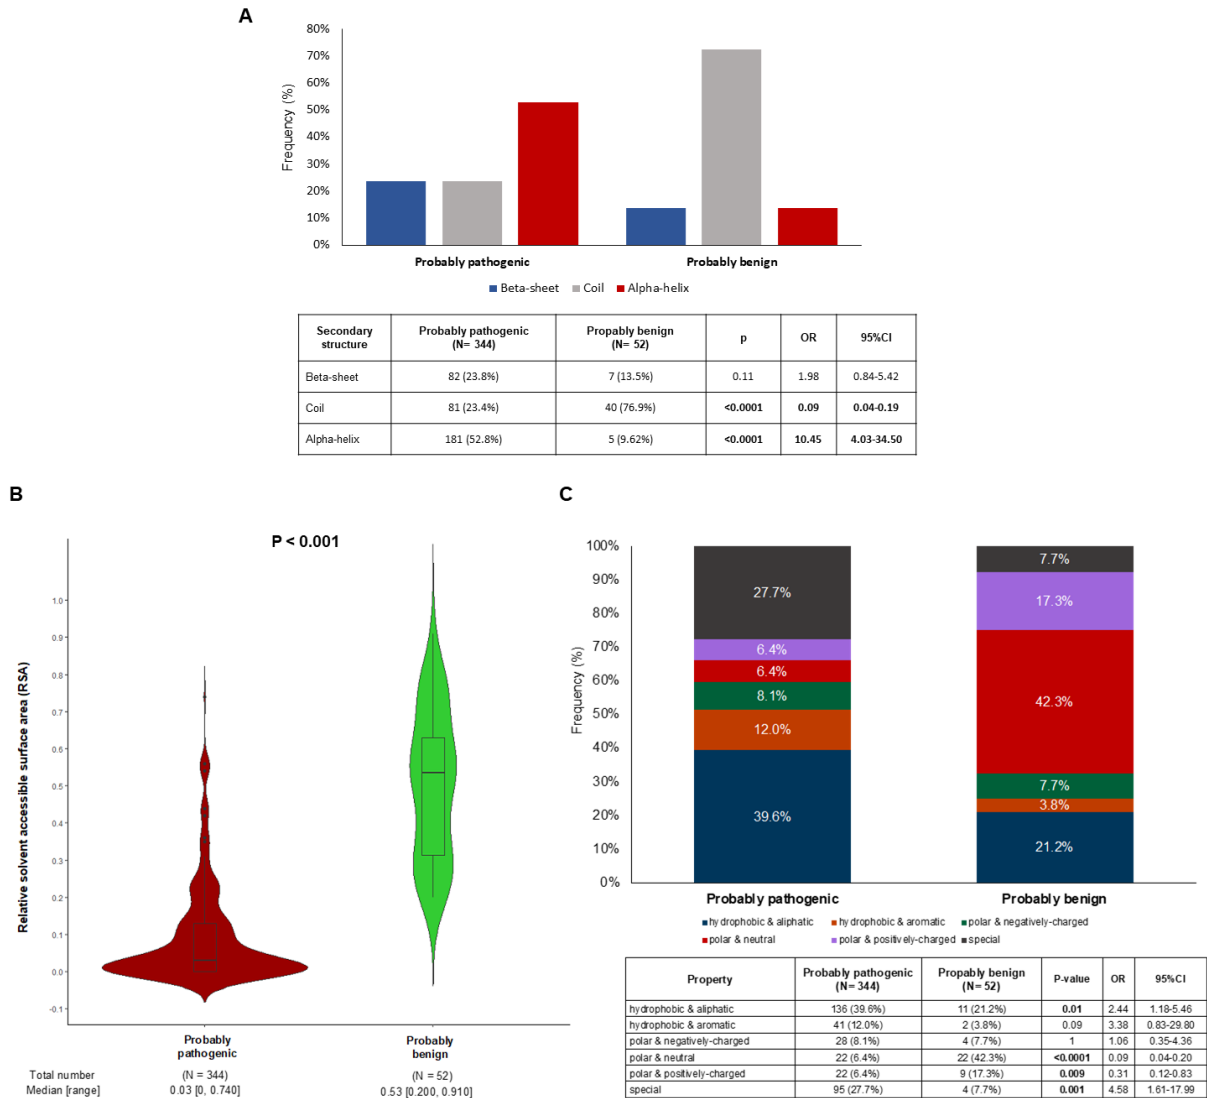

**Supplementary Figure 3. Comparison of missense *MET* TKD defined as “probably pathogenic” and “probably benign” according to three *in silico* tools.** Comparison of (A) secondary structure features, (B) relative solvent accessible surface area (RSA), and (C) mutant amino acid properties of missense *MET* TKD mutations of unknown biological function according to OncoKB. Mutations were defined as “probably pathogenic” for likely pathogenicity across all three tools and as “probably benign” for likely benign across all three scores. OR: odds ratio; 95% CI: 95% confidence interval.
