# Supplementary material for: Activating Point Mutations in the MET Kinase Domain Represent a Unique Molecular Subset of Lung Cancer and Other Malignancies Targetable with MET Inhibitors
Source: PubMed Central journal article supplement — Cancer Discov. 2024 Apr 2;14(8):1440–56. doi: 10.1158/2159-8290.CD-23-1217 (PMC11294820; doi:10.1158/2159-8290.cd-23-1217), 2024-04-02
Supplement: cd-23-1217_supplementary_figure_4_suppsf4.pdf [file cd-23-1217_supplementary_figure_4_suppsf4.pdf]

**Supplementary Figure 4. Type and frequency of *MET* TKD mutations across cancer types in cohort #1.** (A) Frequency of *MET* TKD mutations in various cancer types in cohort #1 according to OncoKB status; the numbers above each bar indicate the number of cases with *MET* TKD mutations (regardless OncoKB annotations) out of the total of cases of each cancer type. (B) Detailed oncogenic / likely oncogenic *MET* TKD mutations according to cancer type in cohort #1. Abbreviation: SCLC: small cell lung cancer, NSCLC: non-small cell lung cancer, CUP: cancer of unknown primary, GU: genitourinary, GIST: gastrointestinal stromal tumors, GI: gastrointestinal, HCC: hepatocellular carcinoma. \*Others: Adenocarcinoma NOS (not otherwise specified).
