# Supplementary material for: Activating Point Mutations in the MET Kinase Domain Represent a Unique Molecular Subset of Lung Cancer and Other Malignancies Targetable with MET Inhibitors
Source: PubMed Central journal article supplement — Cancer Discov. 2024 Apr 2;14(8):1440–56. doi: 10.1158/2159-8290.CD-23-1217 (PMC11294820; doi:10.1158/2159-8290.cd-23-1217), 2024-04-02
Supplement: cd-23-1217_supplementary_figure_5_suppsf5.pdf [file cd-23-1217_supplementary_figure_5_suppsf5.pdf]

# Supplementary Figure 5

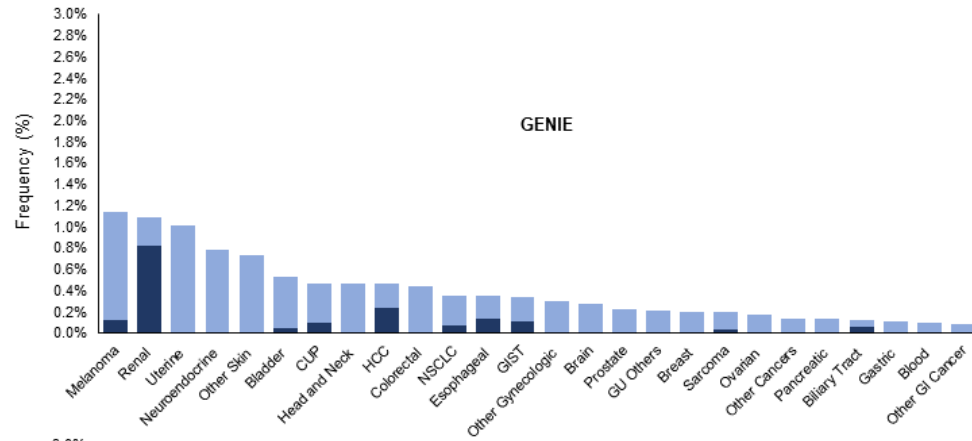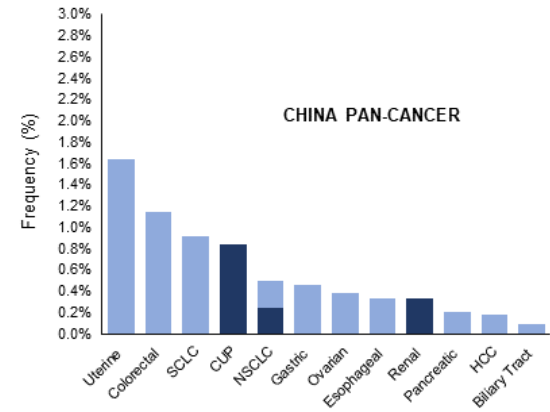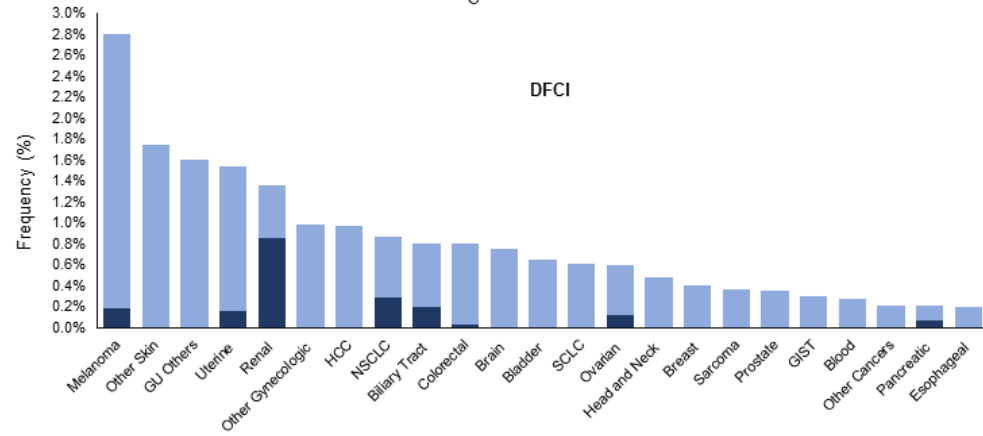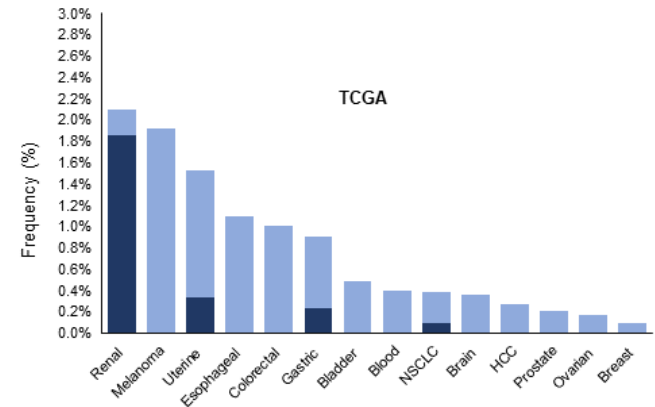

OncoKB annotation:  Oncogenic / Likely oncogenic  Unknown biological function

**Supplementary Figure 5. Prevalence of *MET* TKD mutation in various cancer types according to OncoKB status in each dataset in cohort #1.** Abbreviation: CUP: cancer of unknown primary, HCC: hepatocellular carcinoma, NSCLC: non-small cell lung cancer, GIST: gastrointestinal stromal tumors, GU: genitourinary, SCLC: small cell lung cancer, GI: gastrointestinal. MSKCC cohort is not included in this figure because included only NSCLC cases, as specified in methods section for cohort #1.
