# Supplementary material for: Activating Point Mutations in the MET Kinase Domain Represent a Unique Molecular Subset of Lung Cancer and Other Malignancies Targetable with MET Inhibitors
Source: PubMed Central journal article supplement — Cancer Discov. 2024 Apr 2;14(8):1440–56. doi: 10.1158/2159-8290.CD-23-1217 (PMC11294820; doi:10.1158/2159-8290.cd-23-1217), 2024-04-02
Supplement: cd-23-1217_supplementary_figure_6_suppsf6.pdf [file cd-23-1217_supplementary_figure_6_suppsf6.pdf]

# Supplementary Figure 6

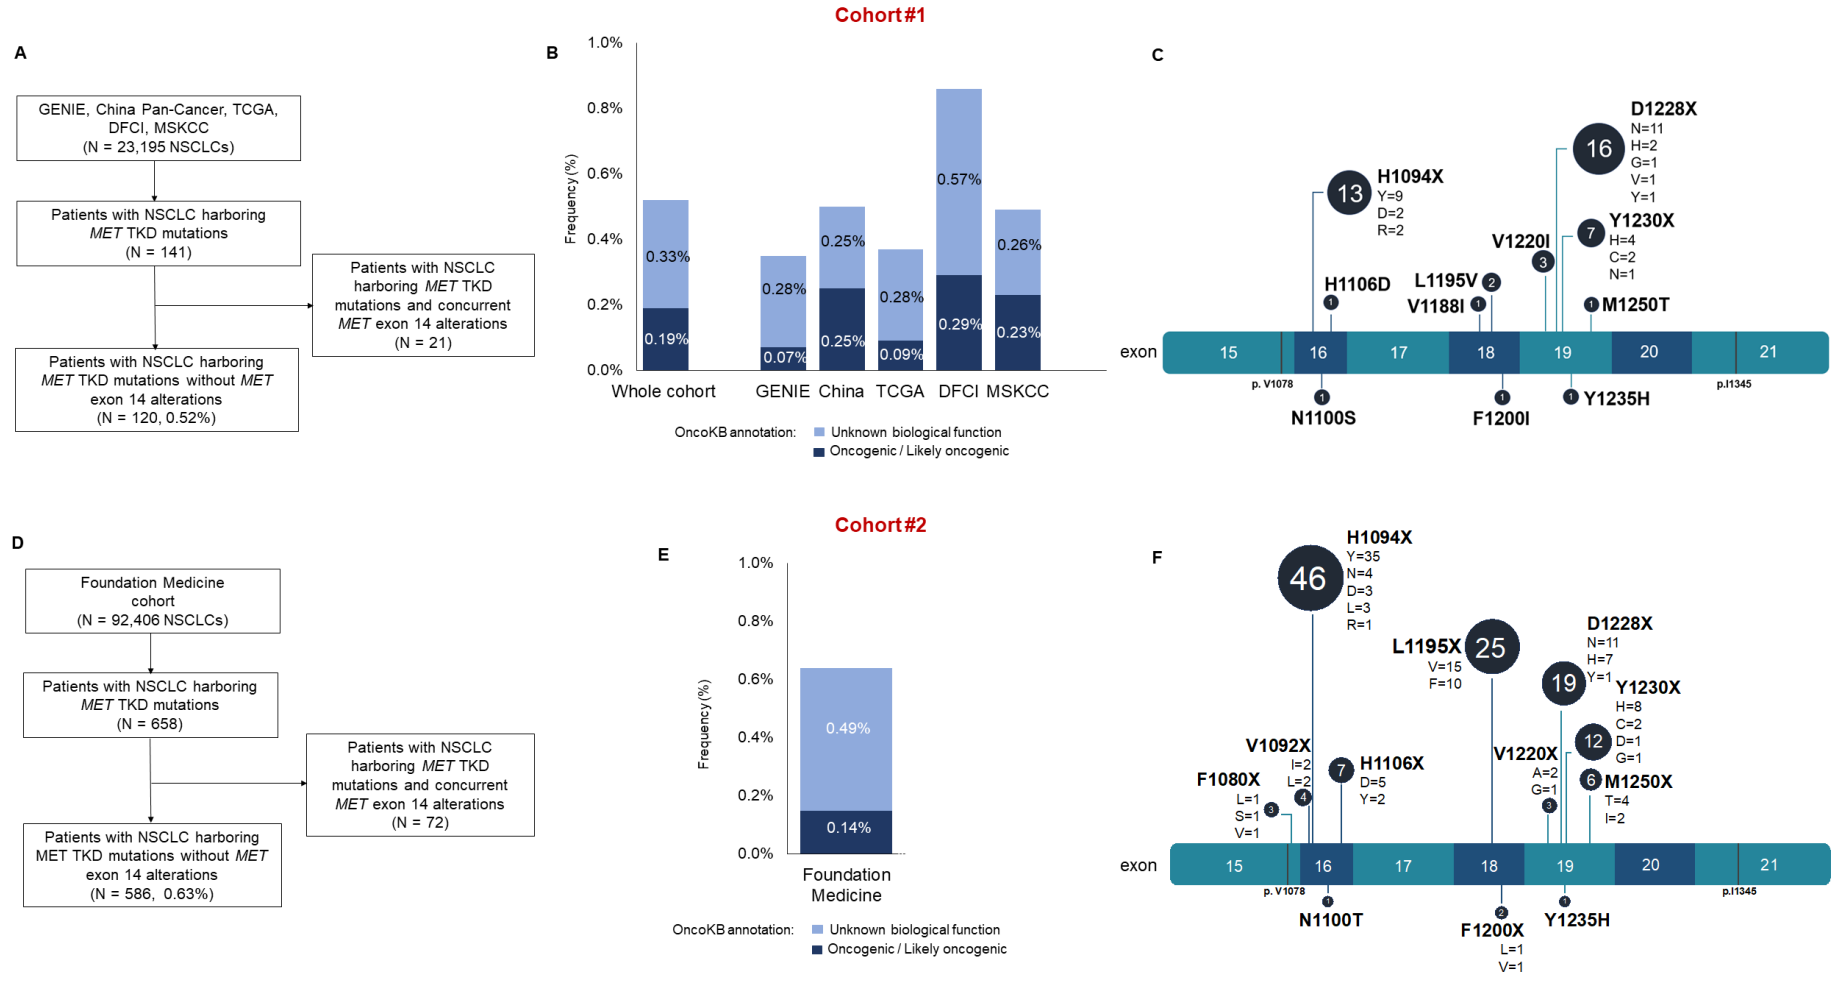

**Supplementary Figure 6. MET TKD mutations in NSCLC in cohort #1 and #2.** (A) Flow chart of the NSCLC subgroup in cohort #1 (123 *MET* TKD mutations in 120 unique patients); (B) Prevalence of *MET* TKD mutations in NSCLC cases according to each dataset in cohort #1; (C) Lollipop plot of the oncogenic / likely oncogenic *MET* TKD mutations detected in NSCLC cases of cohort #1 (47 oncogenic / likely oncogenic *MET* TKD mutations in 44 unique patients); (D) Flow chart of the NSCLC subgroup in cohort #2 (590 *MET* TKD mutations in 586 unique patients); (E) Prevalence of *MET* TKD mutations in NSCLC cases according to cohort #2 (590 *MET* TKD mutations in 586 unique patients); (F) Lollipop plot of the oncogenic / likely oncogenic *MET* TKD mutations detected in NSCLC cases of cohort #2 (129 oncogenic / likely oncogenic *MET* TKD mutations in 129 unique patients).
