# Supplementary material for: Activating Point Mutations in the MET Kinase Domain Represent a Unique Molecular Subset of Lung Cancer and Other Malignancies Targetable with MET Inhibitors
Source: PubMed Central journal article supplement — Cancer Discov. 2024 Apr 2;14(8):1440–56. doi: 10.1158/2159-8290.CD-23-1217 (PMC11294820; doi:10.1158/2159-8290.cd-23-1217), 2024-04-02
Supplement: cd-23-1217_supplementary_figure_7_suppsf7.pdf [file cd-23-1217_supplementary_figure_7_suppsf7.pdf]

# Supplementary Figure 7

## Cohort #1

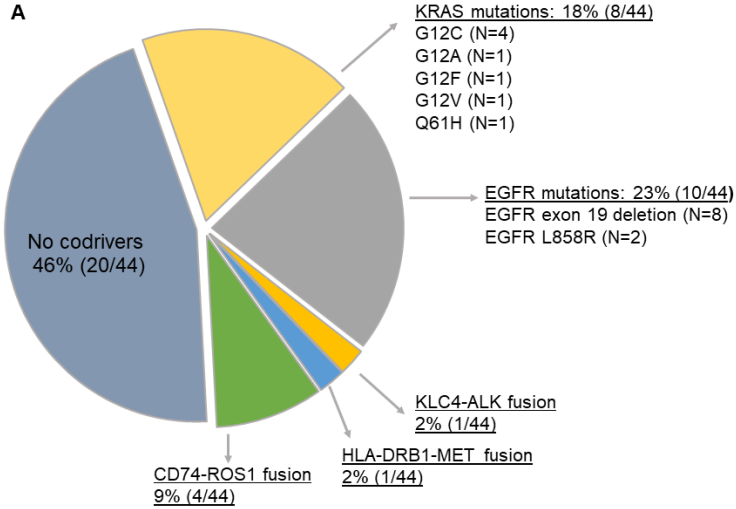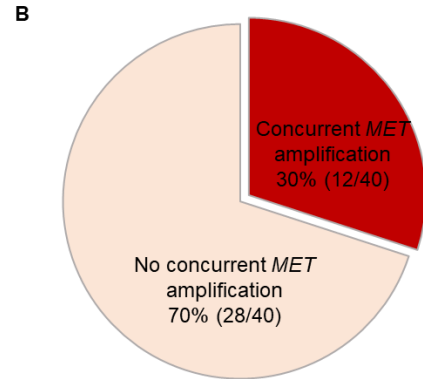

## Cohort #2

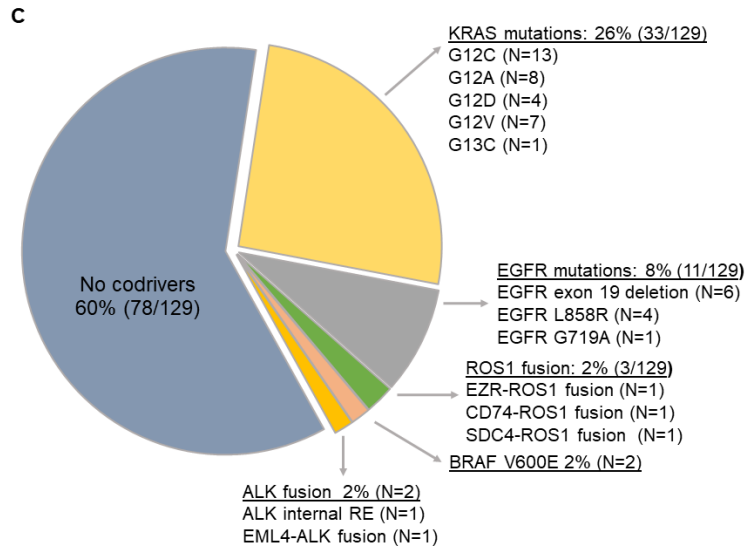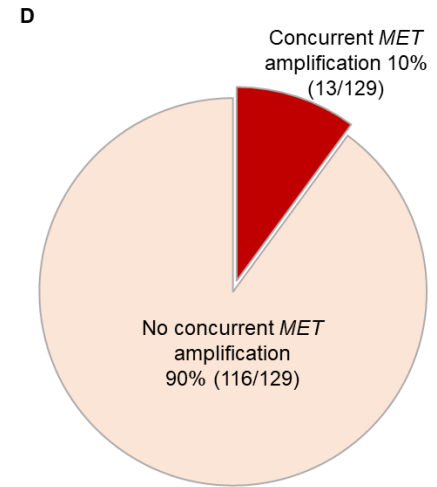

**Supplementary Figure 7. Genomic characterization of NSCLC harboring oncogenic / likely oncogenic *MET* TKD mutations in cohort #1 and #2.**

Genomic characteristics of 44 NSCLC cases harboring oncogenic / likely oncogenic *MET* TKD mutations from cohort #1: **(A)** concurrent driver alterations and **(B)** concurrent *MET* amplification status (information unavailable for 4 cases). Genomic characteristics of 129 NSCLC cases harboring oncogenic / likely oncogenic *MET* TKD mutations from cohort #2: **(C)** concurrent driver alterations and **(D)** concurrent *MET* amplification status. \* *ALK* internal rearrangement (RE): *ALK* internal inversions, as well as internal deletions.
