# Supplementary material for: Activating Point Mutations in the MET Kinase Domain Represent a Unique Molecular Subset of Lung Cancer and Other Malignancies Targetable with MET Inhibitors
Source: PubMed Central journal article supplement — Cancer Discov. 2024 Apr 2;14(8):1440–56. doi: 10.1158/2159-8290.CD-23-1217 (PMC11294820; doi:10.1158/2159-8290.cd-23-1217), 2024-04-02
Supplement: cd-23-1217_supplementary_figure_8_suppsf8.pdf [file cd-23-1217_supplementary_figure_8_suppsf8.pdf]

## Supplementary Figure 8

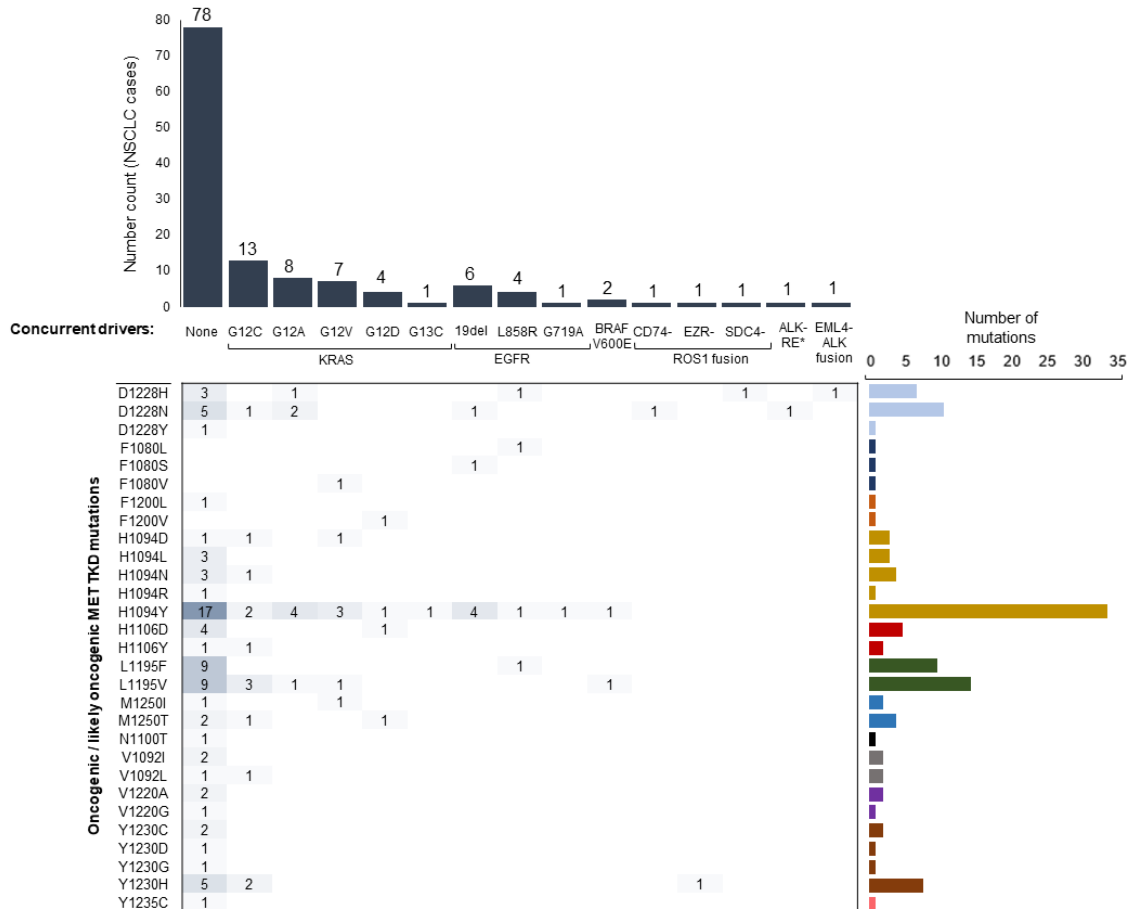

**Supplementary Figure 8.** Concurrent oncogenic driver alterations according to specific oncogenic / likely oncogenic *MET* TKD mutations detected in NSCLC cases (N=129) of cohort #2. \* ALK RE: *ALK* internal rearrangement (RE): *ALK* internal inversions, as well as internal deletions.
