# Supplementary material for: Activating Point Mutations in the MET Kinase Domain Represent a Unique Molecular Subset of Lung Cancer and Other Malignancies Targetable with MET Inhibitors
Source: PubMed Central journal article supplement — Cancer Discov. 2024 Apr 2;14(8):1440–56. doi: 10.1158/2159-8290.CD-23-1217 (PMC11294820; doi:10.1158/2159-8290.cd-23-1217), 2024-04-02
Supplement: cd-23-1217_supplementary_figure_9_suppsf9.pdf [file cd-23-1217_supplementary_figure_9_suppsf9.pdf]

## Supplementary Figure 9

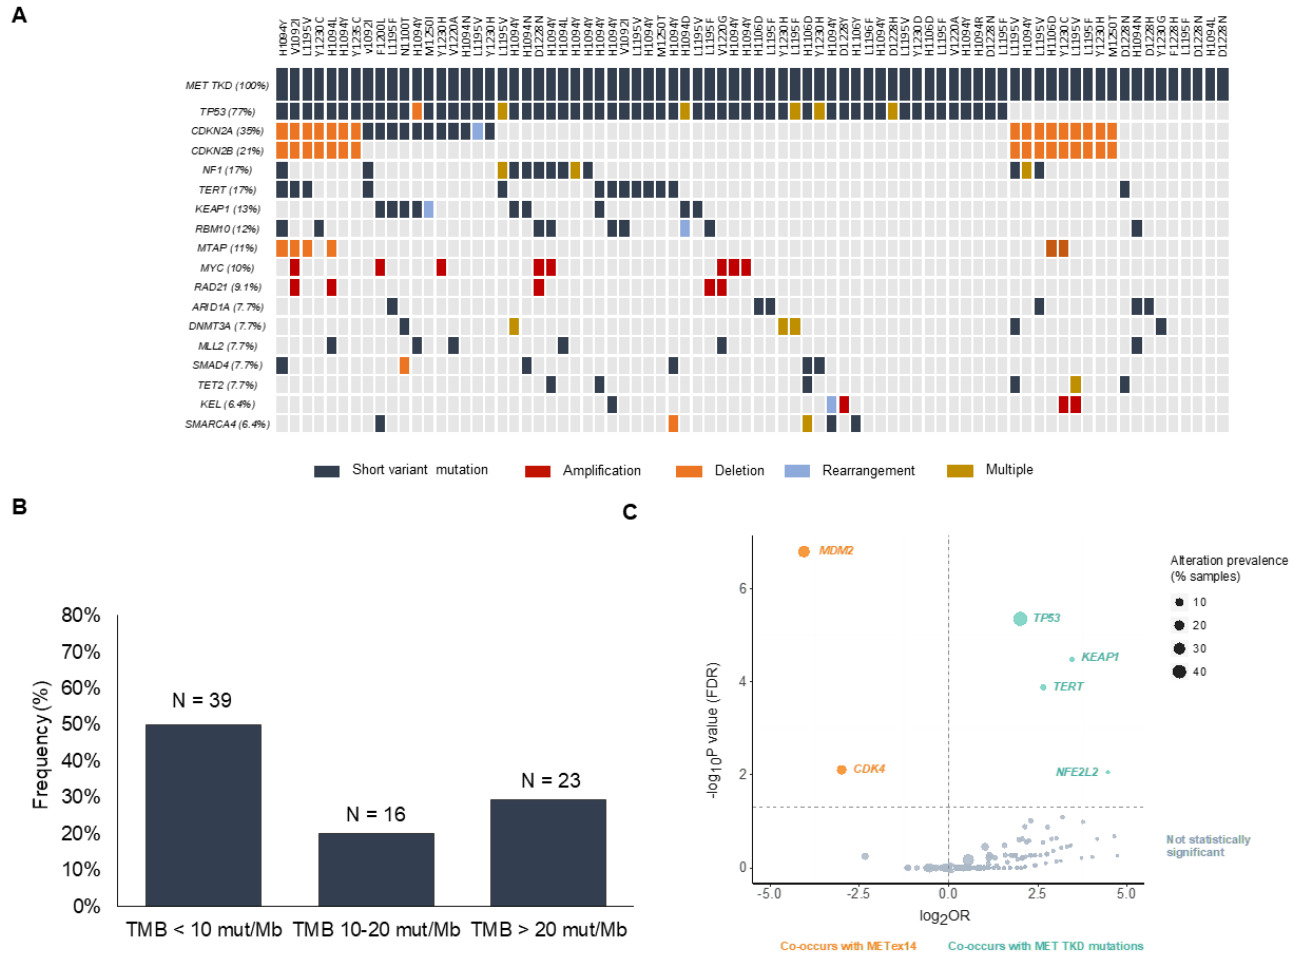

**Supplementary Figure 9. Genomic characterization of NSCLC cases harboring oncogenic / likely oncogenic *MET* TKD mutations in cohort #2.** (A) Oncoprint summarizing the genomic profile and (B) the TMB value of the 78 NSCLC cases with oncogenic / likely oncogenic *MET* TKD mutations without other concurrent driver alterations according to NCCN guidelines. (C) Comparison of the genomic profile of NSCLC cases with oncogenic / likely oncogenic *MET* TKD mutations (N=78) and *MET*ex14-altered NSCLC (N=2036) (q-value < 0.05).
