# Supplementary material for: Activating Point Mutations in the MET Kinase Domain Represent a Unique Molecular Subset of Lung Cancer and Other Malignancies Targetable with MET Inhibitors
Source: PubMed Central journal article supplement — Cancer Discov. 2024 Apr 2;14(8):1440–56. doi: 10.1158/2159-8290.CD-23-1217 (PMC11294820; doi:10.1158/2159-8290.cd-23-1217), 2024-04-02
Supplement: cd-23-1217_supplementary_figure_10_suppsf10.pdf [file cd-23-1217_supplementary_figure_10_suppsf10.pdf]

# Supplementary Figure 10

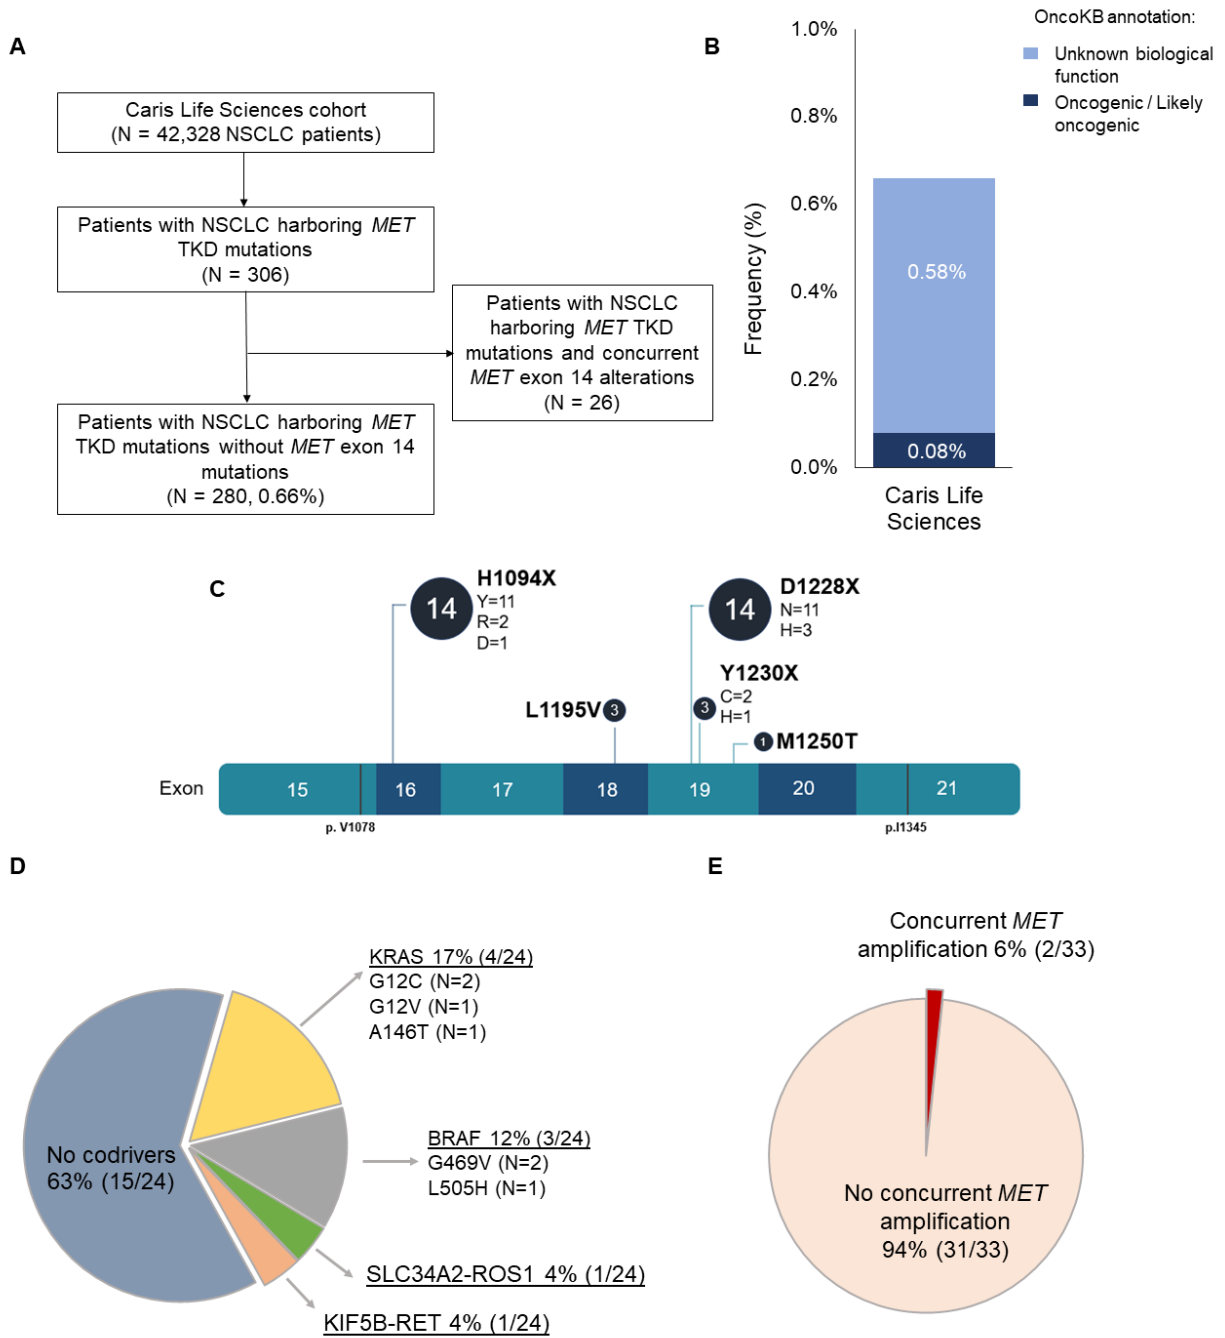

**Supplementary Figure 10. *MET* TKD mutations in NSCLC cohort of Caris Life Sciences.** (A) Flow chart of the NSCLC subgroup in the Caris Life Sciences dataset. (B) Prevalence of *MET* TKD mutations in NSCLC cases in the Caris Life Sciences dataset (*MET* TKD mutations in 280 unique patients). (C) Lollipop plot of the oncogenic / likely oncogenic *MET* TKD mutations detected in NSCLC cases in the Caris Life Sciences dataset (35 oncogenic / likely oncogenic *MET* TKD mutations in 35 unique patients). (D) concurrent driver alterations (information available for 24 cases, unavailable for 11 cases) and (E) concurrent *MET* amplification status (information available for 33 cases, unavailable for 2 cases) of NSCLC cases harboring oncogenic / likely oncogenic *MET* TKD mutations in the Caris Life Sciences dataset.
