# Supplementary material for: Activating Point Mutations in the MET Kinase Domain Represent a Unique Molecular Subset of Lung Cancer and Other Malignancies Targetable with MET Inhibitors
Source: PubMed Central journal article supplement — Cancer Discov. 2024 Apr 2;14(8):1440–56. doi: 10.1158/2159-8290.CD-23-1217 (PMC11294820; doi:10.1158/2159-8290.cd-23-1217), 2024-04-02
Supplement: cd-23-1217_supplementary_figure_11_suppsf11.pdf [file cd-23-1217_supplementary_figure_11_suppsf11.pdf]

# Supplementary Figure 11

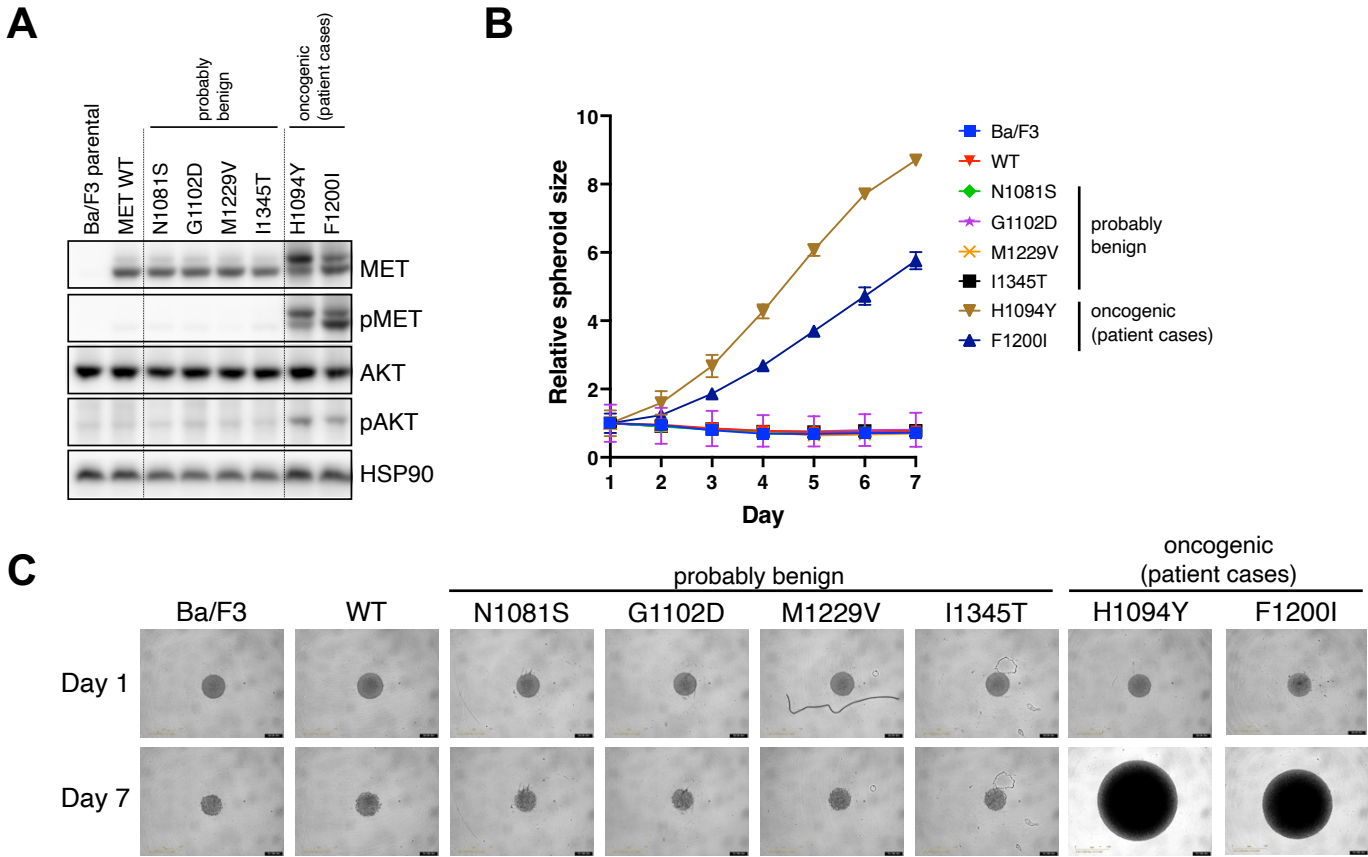

**Supplementary Figure 11. In vitro analysis of “probably benign” *MET* TKD mutations in Ba/F3 cells.** (A) Phosphorylation of MET was analyzed in Ba/F3 cells stably transduced with *MET* TKD mutants. *MET* H1094Y and F1200I were included as positive controls for oncogenic mutations (OncoKB, also detected in the two patient cases) and *MET* WT was included as negative control. (B) IL3-independent cell proliferation of Ba/F3 cells expressing “probably benign” *MET* TKD mutants, shown by relative spheroid size measured daily from day 1 to day 7. (C) Spheroid images of Ba/F3 cells expressing *MET* TKD mutants taken on day 1 and day 7.
