# Supplementary material for: Activating Point Mutations in the MET Kinase Domain Represent a Unique Molecular Subset of Lung Cancer and Other Malignancies Targetable with MET Inhibitors
Source: PubMed Central journal article supplement — Cancer Discov. 2024 Apr 2;14(8):1440–56. doi: 10.1158/2159-8290.CD-23-1217 (PMC11294820; doi:10.1158/2159-8290.cd-23-1217), 2024-04-02
Supplement: cd-23-1217_supplementary_figure_12_suppsf12.pdf [file cd-23-1217_supplementary_figure_12_suppsf12.pdf]

**Supplementary Figure 12**

**A**

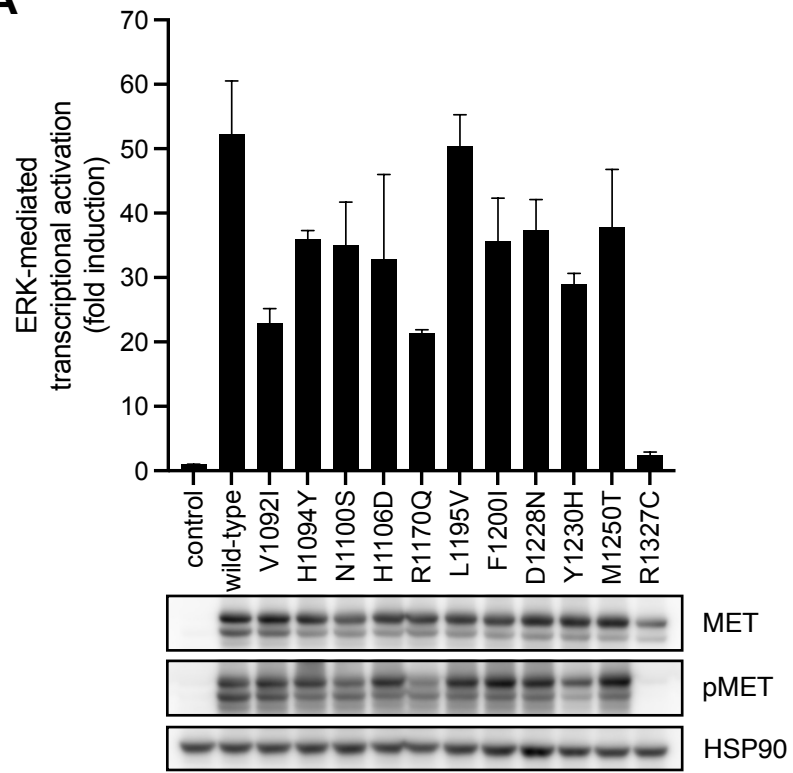

**B**

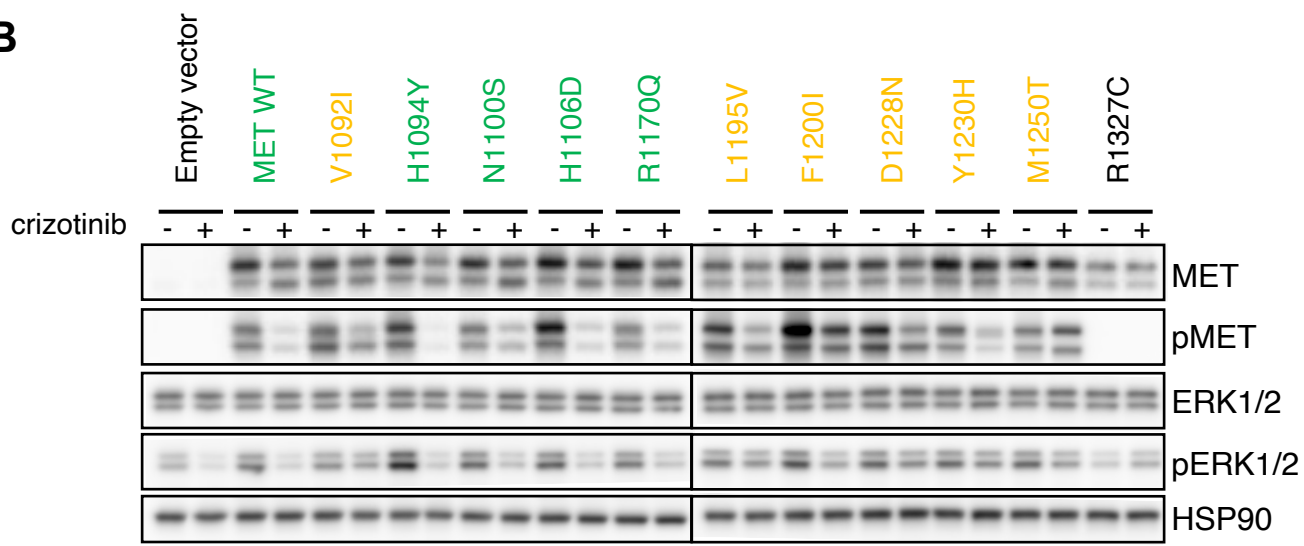

**Supplementary Figure 12. Sensitivity pattern of *MET* TKD mutations in 293T cells.**

**(A)** ERK-mediated transcriptional activation assessed by luciferase assay in 293T cells co-transfected with *MET* WT or TKD mutant constructs, an ERK activation reporter vector (pGL4.33), and a control co-reporter vector (pRL-TK). The lower panel shows western blot analysis of transfected samples. **(B)** Western blot analysis of *MET* and ERK1/2 phosphorylation in response to 1  $\mu$ M crizotinib. *MET* TKD mutants showing sensitivity and resistance to crizotinib are colored green and orange, respectively.
