# Supplementary material for: Activating Point Mutations in the MET Kinase Domain Represent a Unique Molecular Subset of Lung Cancer and Other Malignancies Targetable with MET Inhibitors
Source: PubMed Central journal article supplement — Cancer Discov. 2024 Apr 2;14(8):1440–56. doi: 10.1158/2159-8290.CD-23-1217 (PMC11294820; doi:10.1158/2159-8290.cd-23-1217), 2024-04-02
Supplement: cd-23-1217_supplementary_figure_13_suppsf13.pdf [file cd-23-1217_supplementary_figure_13_suppsf13.pdf]

# Supplementary Figure 13

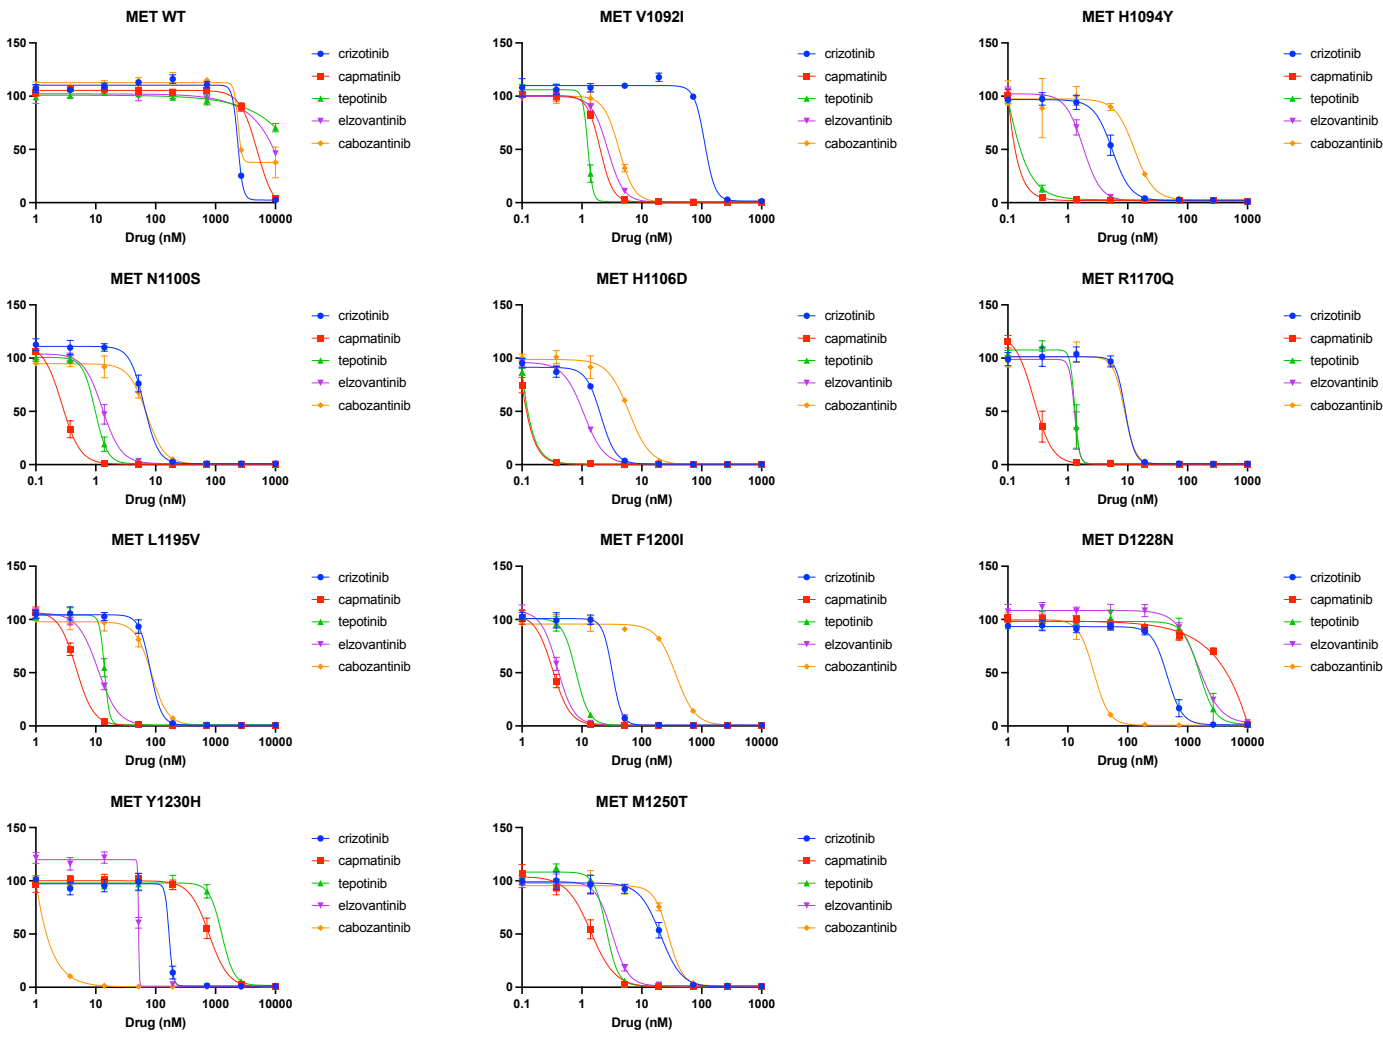

**Supplementary Figure 13. Growth inhibition assays of Ba/F3 cells expressing MET TKD mutants under treatment with MET TKIs.**
