# Supplementary material for: Activating Point Mutations in the MET Kinase Domain Represent a Unique Molecular Subset of Lung Cancer and Other Malignancies Targetable with MET Inhibitors
Source: PubMed Central journal article supplement — Cancer Discov. 2024 Apr 2;14(8):1440–56. doi: 10.1158/2159-8290.CD-23-1217 (PMC11294820; doi:10.1158/2159-8290.cd-23-1217), 2024-04-02
Supplement: cd-23-1217_supplementary_figure_14_suppsf14.pdf [file cd-23-1217_supplementary_figure_14_suppsf14.pdf]

# Supplementary Figure 14

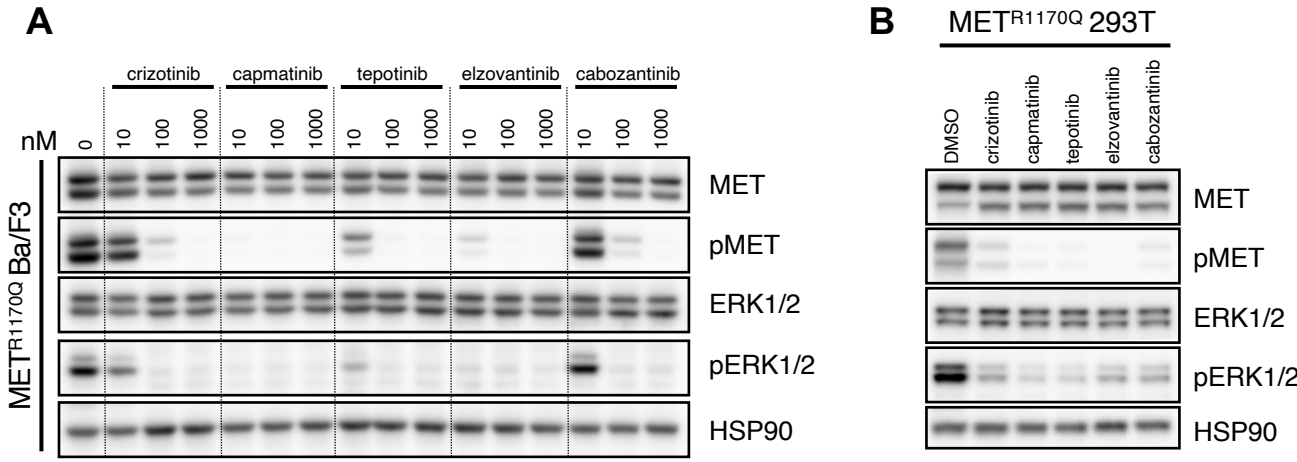

**Supplementary Figure 14. Western blot analysis of MET and ERK1/2 phosphorylation in *MET* R1170Q cell models.** MET and ERK1/2 phosphorylation in (A) Ba/F3 cells stably transduced with *MET* R1170Q and (B) 293T cells transiently overexpressing *MET* R1170Q. Cells were treated with MET TKIs at the indicated dose for Ba/F3 cells or at 1  $\mu$ M for 293T cells.
