# Supplementary material for: Activating Point Mutations in the MET Kinase Domain Represent a Unique Molecular Subset of Lung Cancer and Other Malignancies Targetable with MET Inhibitors
Source: PubMed Central journal article supplement — Cancer Discov. 2024 Apr 2;14(8):1440–56. doi: 10.1158/2159-8290.CD-23-1217 (PMC11294820; doi:10.1158/2159-8290.cd-23-1217), 2024-04-02
Supplement: cd-23-1217_supplementary_figure_15_suppsf15.pdf [file cd-23-1217_supplementary_figure_15_suppsf15.pdf]

# Supplementary Figure 15

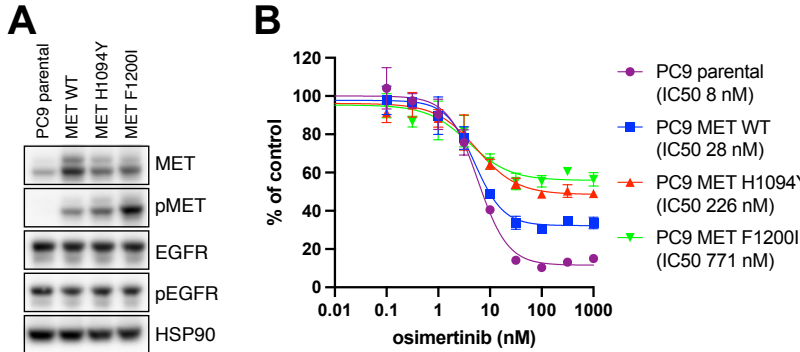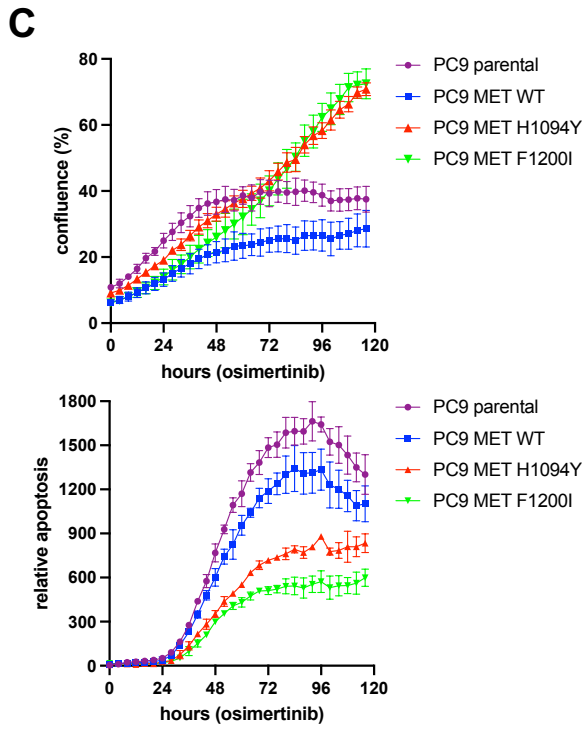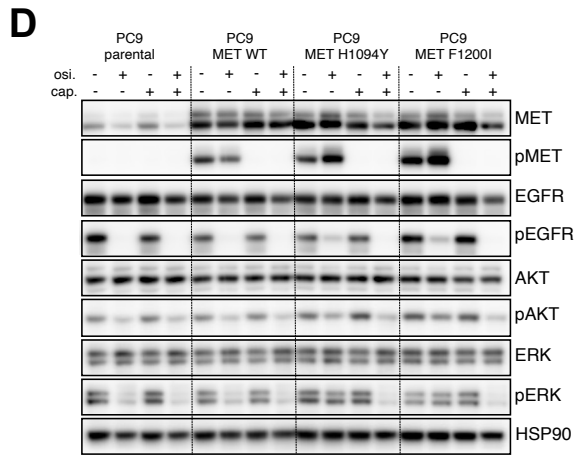

**E**

|             |          | Type Ia    |            | Type Ib   |              | Type II      |
|-------------|----------|------------|------------|-----------|--------------|--------------|
|             |          | crizotinib | capmatinib | tepotinib | elzovantinib | cabozantinib |
| PC9         | parental | 3397       | >10000     | >10000    | 735.9        | 3025         |
| MET TKIs +  | H1094Y   | 7.8        | 0.0        | 1.1       | 3.1          | 15.4         |
| osi. 100 nM | F1200I   | 59.8       | 9.1        | 41.4      | 9.8          | 500          |

  

| Adapted from Figure 5 |           | Type Ia    |            | Type Ib   |              | Type II      |
|-----------------------|-----------|------------|------------|-----------|--------------|--------------|
|                       |           | crizotinib | capmatinib | tepotinib | elzovantinib | cabozantinib |
| Ba/F3                 | WT (+HL3) | 2348.0     | 4978.0     | >10000    | >10000       | 2367.0       |
|                       | H1094Y    | 5.5        | 0.05       | 0.1       | 1.8          | 13.0         |
|                       | F1200I    | 32.1       | 3.3        | 7.9       | 3.9          | 371.1        |

|                   |
|-------------------|
| 1nM≥IC50          |
| 10nM≥IC50>1nM     |
| 200nM≥IC50>10nM   |
| 1000nM≥IC50>200nM |
| IC50>1000nM       |

**Supplementary Figure 15. *In vitro* analysis of *MET* H1094Y and F1200I mutations in PC9 cells.** (A) Establishment of NSCLC cancer cell lines expressing *MET* TKD mutations. PC9 cells were transduced with wild-type (WT) *MET* (as control) and *MET* H1094Y and F1200I. (B) Growth inhibition assay of PC9 cells in response to EGFR inhibition with osimertinib. (C) Cell proliferation and relative apoptosis were monitored under EGFR inhibition with osimertinib (300 nM). (D) Phosphorylation of MET, EGFR, AKT, and ERK was analyzed in PC9 cells expressing *MET* TKD mutants. PC9 cells were treated with osimertinib (1  $\mu$ M) with or without capmatinib (1  $\mu$ M) for 48 hrs. (E) IC50 values of PC9 cells (upper table) and Ba/F3 cells (lower table) expressing *MET* TKD mutants in response to MET TKIs. PC9 cells were treated with gradient dose of MET TKI combined with a fixed dose of osimertinib (100 nM) for 72 hrs.
