# Supplementary material for: Activating Point Mutations in the MET Kinase Domain Represent a Unique Molecular Subset of Lung Cancer and Other Malignancies Targetable with MET Inhibitors
Source: PubMed Central journal article supplement — Cancer Discov. 2024 Apr 2;14(8):1440–56. doi: 10.1158/2159-8290.CD-23-1217 (PMC11294820; doi:10.1158/2159-8290.cd-23-1217), 2024-04-02
Supplement: cd-23-1217_supplementary_figure_16_suppsf16.pdf [file cd-23-1217_supplementary_figure_16_suppsf16.pdf]

## Supplementary Figure 16

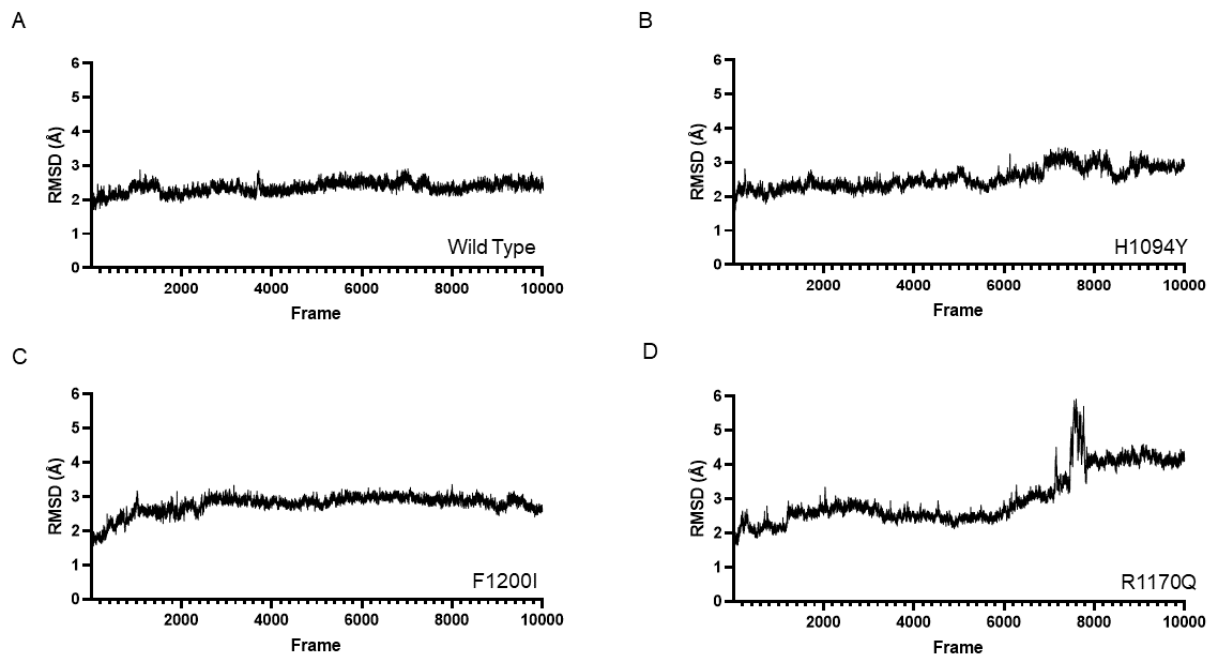

### Supplementary Figure 16. Heavy atom root-mean-square deviation.

Heavy atom root-mean-square deviation (*RMSD*) of each simulation: (A) *MET* wild-type, (B) *MET* H1094Y, (C) *MET* F1200I, and (D) R1170Q. Each frame is taken in a 0.1 ns interval.
