# Supplementary material for: Activating Point Mutations in the MET Kinase Domain Represent a Unique Molecular Subset of Lung Cancer and Other Malignancies Targetable with MET Inhibitors
Source: PubMed Central journal article supplement — Cancer Discov. 2024 Apr 2;14(8):1440–56. doi: 10.1158/2159-8290.CD-23-1217 (PMC11294820; doi:10.1158/2159-8290.cd-23-1217), 2024-04-02
Supplement: cd-23-1217_supplementary_figure_17_suppsf17.pdf [file cd-23-1217_supplementary_figure_17_suppsf17.pdf]

# Supplementary Figure 17

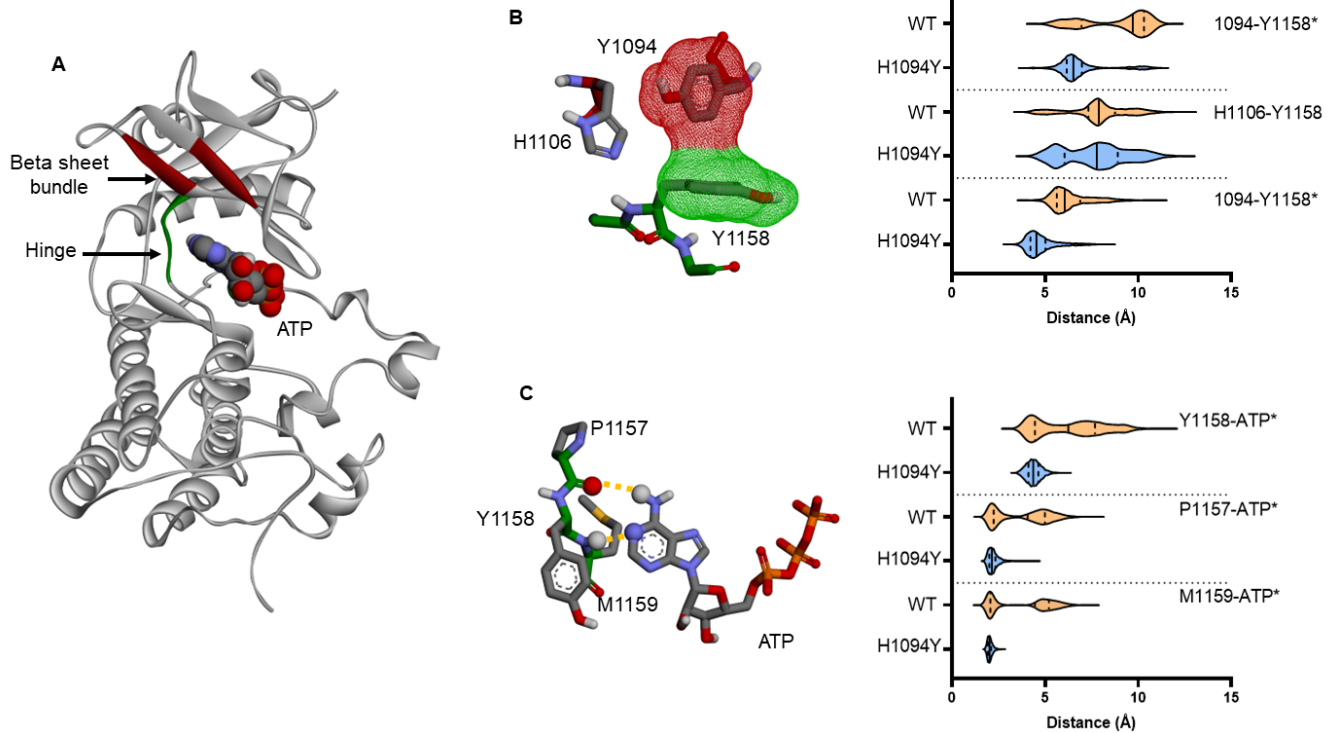

**Supplementary Figure 17. Equilibration of interactions that drives ATP affinity in the presence *MET* H1094Y mutant.** (A) Representative structure of the ATP bound cMET H1094Y with the regions of interest highlighted [subsection of the 5 pleated beta sheet bundle containing H1094Y and direct interactions (red), hinge binding region (green)]. (B) H1094Y forms novel  $\pi$ - $\pi$  stacking interactions (T stacking with an upper cut-off of 5.0 angstroms) with Y1158. (C)  $\pi$ - $\pi$  stacking from Y1158 stabilizes the ATP hydrogen bonding network. \*Indicates that statistical testing with the Mann–Whitney–Wilcoxon test resulted in a P value < 0.01. Values above 12 angstroms were excluded due to ATP unbinding.
