# Supplementary material for: Activating Point Mutations in the MET Kinase Domain Represent a Unique Molecular Subset of Lung Cancer and Other Malignancies Targetable with MET Inhibitors
Source: PubMed Central journal article supplement — Cancer Discov. 2024 Apr 2;14(8):1440–56. doi: 10.1158/2159-8290.CD-23-1217 (PMC11294820; doi:10.1158/2159-8290.cd-23-1217), 2024-04-02
Supplement: cd-23-1217_supplementary_figure_18_suppsf18.pdf [file cd-23-1217_supplementary_figure_18_suppsf18.pdf]

## Supplementary Figure 18

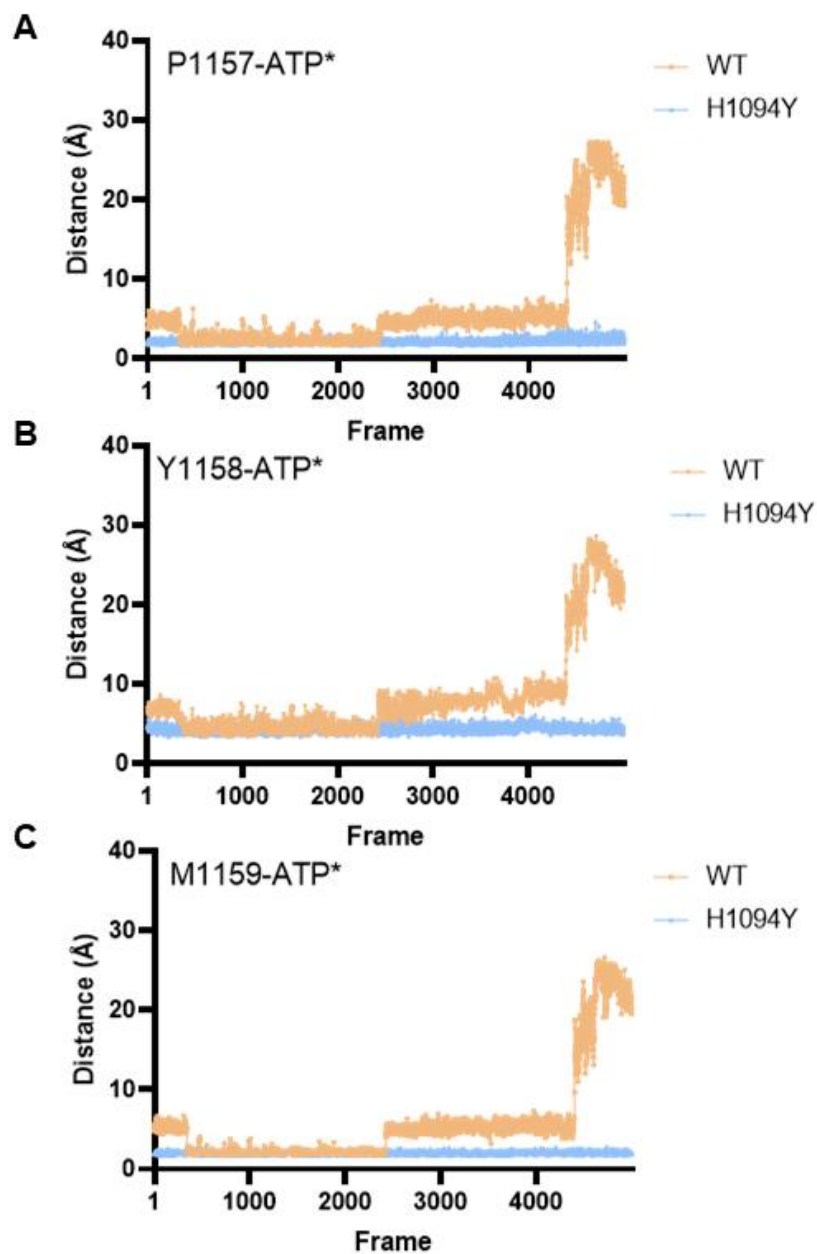

**Supplementary Figure 18. Time resolved interaction distances of ATP in the presence of *MET* WT and *MET* H1094Y mutant. (A) Hydrogen bonding between P1157 backbone carbonyl and ATP, (B) Inter ring center distances for Y1158-ATP  $\pi$ - $\pi$  stacking interactions, and (C) Hydrogen bonding between M1159 backbone amine and ATP distances for ATP interactions between *MET* wild-type (orange) and *MET* H1094Y**

(blue) over the last 500 ns of each trajectory. \*Indicates that statistical testing with the Mann–Whitney–Wilcoxon test resulted in a P value < 0.01.
