# Supplementary material for: Activating Point Mutations in the MET Kinase Domain Represent a Unique Molecular Subset of Lung Cancer and Other Malignancies Targetable with MET Inhibitors
Source: PubMed Central journal article supplement — Cancer Discov. 2024 Apr 2;14(8):1440–56. doi: 10.1158/2159-8290.CD-23-1217 (PMC11294820; doi:10.1158/2159-8290.cd-23-1217), 2024-04-02
Supplement: cd-23-1217_supplementary_figure_20_suppsf20.pdf [file cd-23-1217_supplementary_figure_20_suppsf20.pdf]

## Supplementary Figure 20

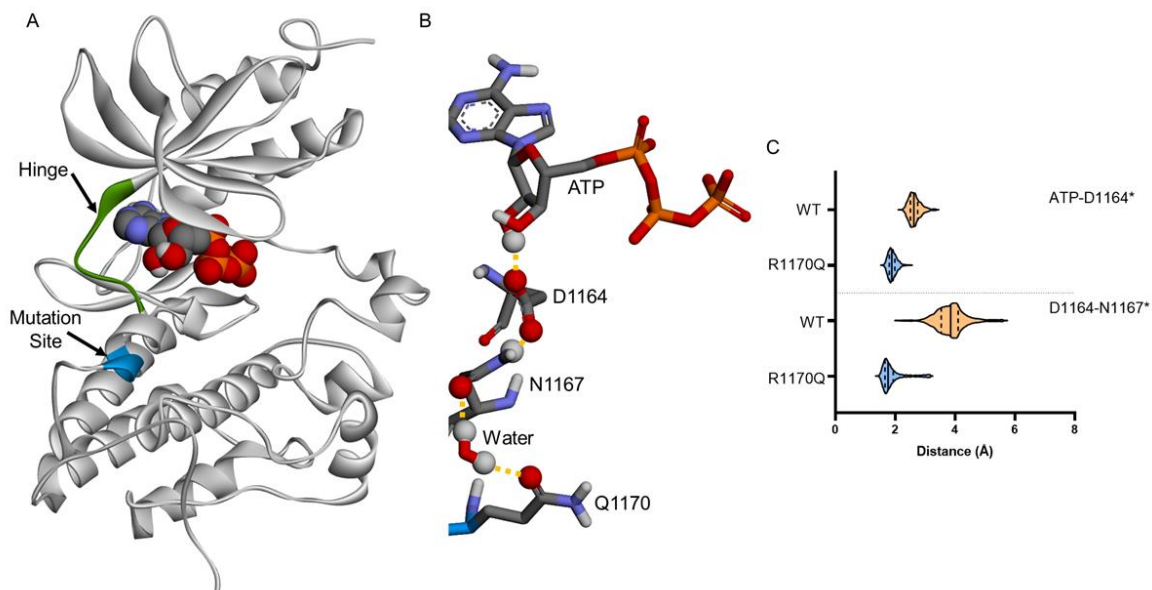

**Supplementary Figure 20. Equilibration of interactions that drives ATP affinity in the presence *MET* R1170Q mutant.** (A) Representative structure of ATP bound *MET* R1170Q with the regions of interest highlighted [hinge site (green), and mutation site (blue)]. (B) Mutation at position 1170 facilitates the formation of a hydrogen bonding network. (C) Interatomic distances for non solvent mediated hydrogen bonding. \* indicates that statistical testing with the Mann–Whitney–Wilcoxon test resulted in a P value < 0.01.
