# Supplementary material for: Activating Point Mutations in the MET Kinase Domain Represent a Unique Molecular Subset of Lung Cancer and Other Malignancies Targetable with MET Inhibitors
Source: PubMed Central journal article supplement — Cancer Discov. 2024 Apr 2;14(8):1440–56. doi: 10.1158/2159-8290.CD-23-1217 (PMC11294820; doi:10.1158/2159-8290.cd-23-1217), 2024-04-02
Supplement: cd-23-1217_supplementary_methods_suppsm.pdf [file cd-23-1217_supplementary_methods_suppsm.pdf]

1 **SUPPLEMENTARY METHODS**

2

3 **Genomic ancestry prediction in Foundation Medicine cohort**

4 To generate a genomic ancestry prediction for each patient in cohort #2, single-  
5 nucleotide polymorphisms (SNPs) targeted by CGP were superimposed with Phase 3  
6 1000 Genomes data and projected down to the top five principal components and used  
7 to train a random forest classifier to recognize five general ancestries: African, admixed  
8 American, East Asian, European, and South Asian [1].

9

10 **Programmed death ligand 1-tumor proportion score in NSCLC of cohort #1 and**  
11 **cohort #2**

12 The PD-L1 TPS was determined for NSCLCs from DFCI, MSKCC and FMI by  
13 immunohistochemistry using validated anti-PD-L1 antibodies including E1L3N (Cell  
14 Signaling Technology, Danvers, MA), 22C3 (Dako North America Inc, Carpinteria, CA),  
15 and 28-8 (Epitomics Inc, Burlingame, CA), according to local institutional practice.

16

17 **Tumor mutational burden assessment in cohort #1 and cohort #2**

18 For cases from DFCI and MSKCC, TMB, defined as the number of somatic,  
19 coding, base substitution, and indel mutations per megabase (mut/Mb) of genome  
20 examined, was determined using OncoPanel and MSK-IMPACT, as previously  
21 described [2,3]. Regarding MSKCC NSCLC cases, comprehensive TMB data for  
22 harmonization from MSK MetTropism (MSK, Cell 2021) dataset were downloaded in  
23 cBioPortal. For NSCLC cases from DFCI and MSKCC, TMB distributions were

24 harmonized across the two sequencing platforms by applying a normal transformation  
25 followed by standardization to z-scores, as previously described [4]. TMB of cases from  
26 TCGA studies and China Pan-cancer according to each platform. For cohort #2, TMB  
27 was calculated by counting the number of non-driver synonymous and non-synonymous  
28 mutations across a 0.8–1.2 megabase (Mb) region, with computational germline status  
29 filtering, and reporting as mutations/Mb. This method has been previously validated for  
30 accuracy against whole exome sequencing [5].

31

## 32 **Caris Life Sciences non-small cell lung cancer cohort**

### 33 *Next generation sequencing*

34 NSCLC tumors molecularly profiled at Caris Life Sciences (Phoenix, AZ) between  
35 2017-2022 were examined for *MET* TKD mutations. Next generation sequencing (NGS)  
36 was performed on genomic DNA isolated from formalin-fixed paraffin-embedded (FFPE)  
37 tumor samples using the NextSeq or NovaSeq 6000 platform (Illumina, Inc., San Diego,  
38 CA). For the Nextseq sequenced tumors, a custom-designed SureSelect XT assay was  
39 used to enrich 592 whole-gene targets (Agilent Technologies, Santa Clara, CA). Further,  
40 for the NovaSeq sequenced tumors, 719 clinically relevant genes were enriched at a high  
41 coverage and read-depth, along with another panel designed to enrich for >20,000 genes  
42 at lower read-depth. All variants were detected with >99% confidence based on allele  
43 frequency and amplicon coverage, with an average sequencing depth of coverage of  
44 >500 and an analytic sensitivity to identify variants with a variant allele frequency of  $\geq 5\%$ .  
45 Genetic variants identified were interpreted by board-certified molecular geneticists and  
46 categorized as ‘pathogenic (P),’ ‘likely pathogenic (LP),’ ‘variant of unknown significance,’

47 'likely benign,' or 'benign,' according to the American College of Medical Genetics and  
48 Genomics (ACMG) standards. When assessing mutation frequencies of individual genes,  
49 'pathogenic' and 'presumed pathogenic' were counted as mutations. The copy number  
50 alteration (CNA) of each exon was determined by calculating the average depth of the  
51 sample along with the sequencing depth of each exon and comparing this calculated  
52 result to a pre-calibrated value.

53

#### 54 *Tumor Mutational Burden Estimation*

55 After excluding all variants previously described as germline alterations according  
56 to dbSNP151, Genome Aggregation Database (gnomAD) databases and those  
57 characterized as benign variants by Caris geneticists, tumor mutational burden (TMB)  
58 was calculated by counting non-synonymous, missense, nonsense, inframe  
59 insertion/deletion and frameshift mutations present in each tumor. A cutoff point of  $\geq 10$   
60 mutations per megabase was used to classify TMB-high (TMB-H) tumors, based on  
61 findings from the KEYNOTE-158 study [6].

62

#### 63 *Immunohistochemistry (IHC) for PD-L1 assessment*

64 IHC was performed on FFPE sections. Slides were stained using automated  
65 staining techniques in accordance with the manufacturer's protocol and were further  
66 optimized and validated as per CLIA/CAO and ISO requirements. A board-certified  
67 pathologist evaluated all IHC results independently. The primary PD-L1 antibody clone  
68 was 22c3 (Dako). Tumor Proportion Score (TPS) was measured as the percentage of  
69 viable tumor cells showing partial or complete membrane staining at any intensity. A

70 tumor was considered PD-L1 positive if its TPS was  $\geq 1\%$  and PD-L1 high if its TPS was  
71  $\geq 50\%$

72

### 73 *Oncogenic driver mutations in NSCLC*

74 Tumors positive for *MET*ex14 alterations were classified as those having likely LP/  
75 P mutations in exon 14 of the *MET* gene or that were positive for *MET*ex14 alterations  
76 (determined by WTS). Oncogenic driver positive NSCLC harbored at least one of the  
77 following alterations: LP/P mutations in *KRAS*, *EGFR*, *BRAF*, *ERBB2*; copy number  
78 amplification of *ERBB2* ( $\geq 6$  copies), *MET*ex14 alterations, LP/P rearrangements in *ALK*,  
79 *ROS1*, *RET*, *NTRK 1-3*, or *NRG1*.

80

### 81 **Preclinical models**

#### 82 *Antibodies and compounds*

83 Antibodies against pMET (Tyr-1234; sc-101736; 1:1000) and MET (sc-161;  
84 1:1000) were purchased from Santa Cruz Biotechnology; phospho-ERK1/2 (#4370;  
85 1:1000); ERK1/2 (#9102; 1:1000), phospho-AKT (#4060; 1:1000), AKT (#9272; 1:1000),  
86 HSP 90 (#4877; 1:1000), phospho-EGFR (#3777; 1:1000); EGFR (#4267; 1:1000); anti-  
87 rabbit IgG HRP-linked antibody (#7074; 1:5000 or 1:10000), and anti-mouse IgG HRP-  
88 linked antibody (#7076; 1:5000 or 1:10000) from Cell Signaling Technology. Crizotinib,  
89 capmatinib, tepotinib, cabozantinib, and osimertinib were purchased from Selleckchem.  
90 Elzovantinib (TPX-0022) was provided by Turning Point Therapeutics.

91

#### 92 *Transfection and Luciferase assay*

93 Transfection experiments were performed using FuGENE HD Transfection  
94 Reagent (Promega) as per the manufacturer's protocol. For luciferase assays, the  
95 pGL4.33[luc2P/SRE/Hygro] and pRL-TK vectors (Promega) were co-transfected with  
96 MET expression vectors. At 72 hours after transfection, the cells were lysed and  
97 subjected to either western blotting or luciferase assay. Luciferase activity was  
98 measured using the Dual-Luciferase Reporter Assay System (Promega). All  
99 experimental conditions were set up in 3 wells.

100

## 101 **Structural analysis**

### 102 *Generation of the MET Models*

103 The cocrystal structure of MET with ATP (PDBID:3DKC) was used to build the  
104 simulation system. Initial modeling was done in the Schrodinger 2022-3. The protein  
105 preparation wizard was used to assign bond orders, add hydrogens, create disulfide  
106 bonds, and fill in missing side chains using the Prime module. Ionization and tautomeric  
107 states for heteroatom groups were generated using the Epik module at neutral pH (pH  
108  $7.0 \pm 2.0$ ), and protonated states of titratable residues were determined by pKa  
109 calculations at physiological conditions (pH  $7.0 \pm 2.0$ ) using the PROPKA module. A  
110 restrained minimization was also performed on all atoms using the OPLS4 force field  
111 [7]. The minimization was considered converged once heavy atom displacement was  
112 below 0.3 angstroms. Orientations of asparagine and glutamine were sampled at this  
113 step to optimize the hydrogen bonding network using the built in workflow. Waters within  
114 5.0 angstroms of the ATP and Mg<sup>+2</sup> were retained [8,9]. This initial structure contained  
115 3 engineered residues at positions 1194, 1234, and 1235. As such, we used this

116 structure as a template for the generation of active state ATP bound MET kinase  
117 homology models for mutants. To model the wild type structure, the canonical sequence  
118 (Primary accession number: P08581) was used. Appropriate substitutions in the  
119 canonical sequence was done to generate the H1094Y, F1200I, and R1170Q models  
120 [10]. These three sequences were aligned using ClustalW to the structure of crystal  
121 structure. ATP, Mg<sup>+2</sup> ion, and the one water molecule that chelates the Mg<sup>+2</sup> ion were  
122 used as co-factors when building the homology models.

123

#### 124 *ATP Parameterization*

125       The initial ATP bound in wild type MET crystal was used for parametrization. In  
126 this model, the triphosphate tail of ATP is fully deprotonated resulting in a -4 charge. We  
127 generated a force field based optimized complex for the initial geometry for the quantum  
128 mechanical calculations. The initial complex underwent a global unrestrained  
129 minimization using the OPLS4 forced field using the Prime minimization panel. An  
130 implicit (variable-dielectric generalized Born model) solvent model for water was used  
131 during the minimization. From this minimized complex, the ATP, Mg<sup>+2</sup> ion, chelating  
132 water, residues 1209 and 1222 (residues with side chains that interact with the Mg<sup>+2</sup>  
133 ion), and residues 1159 and 1160 (residues that hydrogen bond with the ATP  
134 adenosine group) were extracted for quantum mechanical treatment. The three peptide  
135 fragments (residues 1159 and 1160, 1209, and 1222), were capped using acetyl group  
136 or N-methyl amide on the N and C terminus, respectively. These capping groups were  
137 orientated to retain the backbone angles of neighboring residues. This complex served  
138 as the initial coordinates for quantum mechanical calculations for charges.

139 This complex then underwent geometry optimization at the B3LYP-D3/6-  
140 311G(d,p)++. Diffuse and polarizable functions were added to the basis set. Default  
141 parameters were chosen for Jaguar optimization [11,12]. The initial Hessian for the  
142 geometry optimization was calculated from the basis set. Backbones of the three  
143 peptide fragments (residues 1159 and 1160, 1209, and 1222) including capping groups  
144 were constrained in the X, Y, and Z axis keeping their position fixed. The side chains of  
145 residues 1159 and 1160 were also held fixed. Due to the side chains of residues 1209  
146 and 1222 chelating the Mg<sup>+2</sup>, no constraints were applied to these side chains. Output  
147 of the geometry optimization was used as the initial coordinates for single point energy  
148 calculations for electrostatic potential charge (ESP) generation utilizing the B3LYP-D3  
149 with the 6-311G(d,p)++ basis set [13,14]. This was used in building the simulation  
150 system.

151

### 152 *Model System Generation*

153 Using CHARMM-GUI enhanced sampler, we generated input files for the 4 ATP  
154 containing MET, the active wild type, H1094Y, F1200I, and R1170Q systems [15,16]. A  
155 rectangular water box was fitted to the protein structure. The edge distance was  
156 specified as 12.5 angstroms. In addition to neutralizing ions, a KCl concentration of 150  
157 mM was used. This accounts for approximately 130 ions in each system. TIP3P was  
158 used as the water model for these systems. Parameters for ions were derived from the  
159 TIP3P leaprc file and included a 12-6 non-bonded correction. The FF19SB force field  
160 was used to parameterize protein residues [17]. Hydrogen mass repartitioning was also

161 used in these simulations to enable a 4-fs time step by redistributing heavy atom mass  
162 to the attached hydrogens.

163

#### 164 *All-Atom MD Simulations*

165 All molecular dynamics simulations were performed in Amber 22 using reference  
166 GeForce RTX 3060 ti or 3080 ti GPUs. The PMEMD.CUDA program in AMBER22 was  
167 used to conduct all simulations [17]. The equilibration protocol was consisted of a two-  
168 stage minimization protocol with the steepest descent (5,000 steps) and conjugate  
169 gradient (5,000 steps) for each model system. A restraint potential of  $1.0 \text{ kcal/mol}\cdot\text{\AA}^2$   
170 was applied to protein residues during the initial minimization to remove any potential  
171 steric clashes from  $\text{K}^+$  or  $\text{Cl}^-$  ions, and water molecules. Equilibrium simulations were  
172 carried out after initial minimization calculations. These equilibration simulations were  
173 carried out for a total of 0.25 ns using an integration time step of 1 fs. Langevin  
174 dynamics was used to control the temperature of the system. Initial velocities were  
175 generated for a target temperature of 303.15K. Long-range electrostatics were  
176 calculated using the particle mesh Ewald method with a 9.0 angstrom cutoff. The  
177 SHAKE algorithm was used to treat the solvent molecules. Production molecular  
178 dynamics simulations were carried out for 1000ns with snapshots taken every 0.1 ns.

179

#### 180 *Analysis of MD Simulations*

181 All analyses were performed on the last 500ns of the production trajectories.  
182 After removal of water and charged ions except for the  $\text{Mg}^{+2}$  ion, production trajectories  
183 were outputted in dcd and netcdf formats for follow-up analysis. The production



184 trajectories additionally had been saved with 1ns interval between each frame. The  
185 distance measurements were taken using CPPTRAJ over the last 500 ns of the  
186 simulations. RMSF and RMSD values were also calculated using CPPTRAJ [18]. The  
187 MMPBSA.py utility in AmberTools was used to calculate the  $\Delta G$  of binding based on a  
188 single trajectory MM/GBSA protocol. The last 500 frames of the reduced trajectories  
189 representing snap shots from 500 ns to 1000 ns at an interval of 1ns were used. ATP  
190 was used as the ligand in calculations. The Mg+2 ion was treated as part of the  
191 receptor. The ante-MMPBSA.py utility was used to generate the initial input files based  
192 on the parameterized complex [19]. These calculations were carried out using a  
193 modified GB mode} with the reference salt concentration of 0.15 M [20]. Statistical  
194 analysis was performed using GraphPad. A Mann–Whitney–Wilcoxon test was used to  
195 test interaction distances.

196

## 197 **Supplementary References**

- 198 1. Connelly CF, Carrot-Zhang J, Stephens PJ, Frampton GM. Abstract 1227: Somatic  
199 genome alterations in cancer as compared to inferred patient ancestry. *Cancer Res.*  
200 2018; 78: 1227.
- 201 2. Garcia EP, Minkovsky A, Jia Y, Ducar MD, Shivdasani P, Gong X, et al. Validation of  
202 OncoPanel: A Targeted Next-Generation Sequencing Assay for the Detection of  
203 Somatic Variants in Cancer. *Arch Pathol Lab Med.* 2017;141:751–8.
- 204 3. Cheng DT, Mitchell TN, Zehir A, Shah RH, Benayed R, Syed A, et al. Memorial Sloan  
205 Kettering-Integrated Mutation Profiling of Actionable Cancer Targets (MSK-IMPACT): A  
206 Hybridization Capture-Based Next-Generation Sequencing Clinical Assay for Solid  
207 Tumor Molecular Oncology. *J Mol Diagn.* 2015;17:251–64.
- 208 4. Vokes NI, Liu D, Ricciuti B, Jimenez-Aguilar E, Rizvi H, Dietlein F, et al.  
209 Harmonization of Tumor Mutational Burden Quantification and Association With  
210 Response to Immune Checkpoint Blockade in Non–Small-Cell Lung Cancer. *JCO*  
211 *Precis Oncol.* 2019;3:1–12.
- 212 5. Lee JK, Sivakumar S, Schrock AB, Madison R, Fabrizio D, Gjoerup O, et al.  
213 Comprehensive pan-cancer genomic landscape of KRAS altered cancers and real-  
214 world outcomes in solid tumors. *NPJ Precis Oncol.* 2022; 6:91.

215 6. Marabelle A, Fakih M, Lopez J, Shah M, Shapira-Frommer R, Nakagawa K, et al.  
216 Association of tumour mutational burden with outcomes in patients with advanced solid  
217 tumours treated with pembrolizumab: prospective biomarker analysis of the multicohort,  
218 open-label, phase 2 KEYNOTE-158 study. *Lancet Oncol.* 2020; 21:1353–65.

219 7. Lu C, Wu C, Ghoreishi D, Chen W, Wang L, Damm W, et al. OPLS4: Improving  
220 Force Field Accuracy on Challenging Regimes of Chemical Space. *J Chem Theory*  
221 *Comput.* 2021; 17:4291–4300.

222 8. Shelley JC, Cholleti A, Frye LL, Greenwood JR, Timlin MR, Uchimaya M. Epik: A  
223 software program for pKa prediction and protonation state generation for drug-like  
224 molecules. *J Comput Aided Mol Des.* 2007; 21:681–691.

225 9. Madhavi Sastry G, Adzhigirey M, Day T, Annabhimoju R, Sherman W. Protein and  
226 ligand preparation: Parameters, protocols, and influence on virtual screening  
227 enrichments. *J Comput Aided Mol Des.* 2013; 27:221–234.

228 10. Larkin MA, Blackshields G, Brown NP, Chenna R, Mcgettigan PA, McWilliam H, et  
229 al. Clustal W and Clustal X version 2.0. *Bioinformatics.* 2007; 23:2947–2948.

230 11. Bochevarov AD, Watson MA, Greenwood JR, Philipp DM. Multiconformation,  
231 Density Functional Theory-Based pKa Prediction in Application to Large, Flexible  
232 Organic Molecules with Diverse Functional Groups. *J Chem Theory Comput.*  
233 2016;12:6001-6019.

234 12. Yu HS, Watson MA, Bochevarov AD. Weighted Averaging Scheme and Local  
235 Atomic Descriptor for pKa Prediction Based on Density Functional Theory. *J Chem Inf*  
236 *Model.* 2018; 58:271–286.

237 13. Ditchfield R, Hehre WJ, Pople JA. Self-Consistent Molecular-Orbital Methods. IX. An  
238 Extended Gaussian-Type Basis for Molecular-Orbital Studies of Organic Molecules. *J*  
239 *Chem Phys.* 1971; 54:724–728.

240 14. Grimme S, Antony J, Ehrlich S, Krieg H. A consistent and accurate ab initio  
241 parametrization of density functional dispersion correction (DFT-D) for the 94 elements  
242 H-Pu. *J Chem Phys.* 2010; 132:154104.

243 15. Jo S, Cheng X, Lee J, Kim S, Park SJ, Patel DS, et al. CHARMM-GUI 10 years for  
244 biomolecular modeling and simulation. *J Comput Chem.* 2017;38:1114–1124.

245 16. Jo S, Kim T, Iyer VG, Im W. CHARMM-GUI: a web-based graphical user interface  
246 for CHARMM. *J Comput Chem.* 2008;29:1859-1865.

247 17. Alabbas AB. Identification of promising methionine aminopeptidase enzyme  
248 inhibitors: A combine study of comprehensive virtual screening and dynamics simulation  
249 study. *Saudi Pharm J.* 2023;31:101745.

250 18. Roe DR, Cheatham TE. PTRAJ and CPPTRAJ: Software for Processing and  
251 Analysis of Molecular Dynamics Trajectory Data. *J Chem Theory Comput.* 2013;9:3084-  
252 3095.

253 19. Miller BR, McGee TD, Swails JM, Homeyer N, Gohlke H, Roitberg AE. MMPBSA.py:  
254 An Efficient Program for End-State Free Energy Calculations. *J Chem Theory Comput.*  
255 2012;8:3314-3321.

256 20. Onufriev A, Bashford D, Case DA. Exploring protein native states and large-scale  
257 conformational changes with a modified generalized born model. *Proteins.* 2004;55:383-  
258 394.

259
