# Supplementary material for: Activating Point Mutations in the MET Kinase Domain Represent a Unique Molecular Subset of Lung Cancer and Other Malignancies Targetable with MET Inhibitors
Source: PubMed Central journal article supplement — Cancer Discov. 2024 Apr 2;14(8):1440–56. doi: 10.1158/2159-8290.CD-23-1217 (PMC11294820; doi:10.1158/2159-8290.cd-23-1217), 2024-04-02
Supplement: cd-23-1217_supplementary_table_1_suppst1.pdf [file cd-23-1217_supplementary_table_1_suppst1.pdf]

**Supplementary Table 1.** Prevalence of *MET* tyrosine kinase domain (TKD) mutations in each dataset of the cohort #1.

| Cohort<br>Tumor types<br>N (unique<br>patients)                                                | Individual cohorts                |                                                  |                                  |                                  |                             | Total<br>(cohort #1)               |
|------------------------------------------------------------------------------------------------|-----------------------------------|--------------------------------------------------|----------------------------------|----------------------------------|-----------------------------|------------------------------------|
|                                                                                                | GENIE<br>Pan-cancer<br>(N=81,025) | China Pan-<br>Cancer<br>Pan-cancer<br>(N=10,194) | TCGA<br>Pan-cancer<br>(N=10,953) | DFCI<br>Pan-cancer<br>(N=34,989) | MSKCC<br>NSCLC<br>(N=8,788) | Total<br>Pan-cancer<br>(N=145,949) |
| <b><i>MET</i> TKD<br/>mutations</b>                                                            | 300 (0.37%)                       | 40 (0.39%)                                       | 64 (0.58%)                       | 233 (0.66%)                      | 55 (0.62%)                  | 692 (0.47%)                        |
| <b><i>MET</i> TKD<br/>mutations with<br/>concurrent <i>MET</i><br/>exon 14<br/>alterations</b> | 8 (0.01%)                         | 0                                                | 0                                | 9 (0.02%)                        | 11 (0.12%)                  | 28 (0.01%)                         |
| <b><i>MET</i> TKD without<br/>concurrent <i>MET</i><br/>exon 14<br/>alterations</b>            | 292 (0.36%)                       | 40 (0.39%)                                       | 64 (0.58%)                       | 224 (0.64%)                      | 44 (0.5%)                   | 664 (0.45%)                        |
