# Supplementary material for: Activating Point Mutations in the MET Kinase Domain Represent a Unique Molecular Subset of Lung Cancer and Other Malignancies Targetable with MET Inhibitors
Source: PubMed Central journal article supplement — Cancer Discov. 2024 Apr 2;14(8):1440–56. doi: 10.1158/2159-8290.CD-23-1217 (PMC11294820; doi:10.1158/2159-8290.cd-23-1217), 2024-04-02
Supplement: cd-23-1217_supplementary_table_2_suppst2.pdf [file cd-23-1217_supplementary_table_2_suppst2.pdf]

**Supplementary Table 2.** Frequency of *MET* tyrosine kinase domain (TKD) mutations in cohort #1 according to amino acid residue, out of a total of 711 *MET* TKD mutations.

| <b>MET residue</b> | <b>Number</b> | <b>% out of a total of 711 mutations</b> |
|--------------------|---------------|------------------------------------------|
| R1170*/Q/Qfs*9     | 49            | 6.90                                     |
| H1094Y/D/R/N       | 27            | 3.80                                     |
| D1228N/H/Y/A/G/V   | 25            | 3.52                                     |
| R1327C/H/L         | 21            | 2.95                                     |
| Y1230H/C/N/G/S     | 21            | 2.95                                     |
| R1148Q/*           | 20            | 2.81                                     |
| R1166*/Q/P         | 14            | 1.97                                     |
| H1079R/Y           | 13            | 1.83                                     |
| G1119A/E/del/R     | 12            | 1.69                                     |
| M1160I/L/V         | 10            | 1.41                                     |
| M1250T             | 10            | 1.41                                     |
| P1153L/S/Q         | 9             | 1.27                                     |
| X1266_splice       | 9             | 1.27                                     |
| G1095E/R/V         | 8             | 1.13                                     |
| R1336Q/W/P         | 8             | 1.13                                     |
| V1287I/A           | 8             | 1.13                                     |
| D1180Y/E/V/lfs*9   | 7             | 0.98                                     |
| E1325K             | 7             | 0.98                                     |
| F1200I/V/vfs*15    | 7             | 0.98                                     |
| K1199Sfs*49*/E/R/T | 7             | 0.98                                     |
| Q1258*/K/L         | 7             | 0.98                                     |
| V1271M/L           | 7             | 0.98                                     |
| W1249*/R/C         | 7             | 0.98                                     |
| Y1234F*/C          | 7             | 0.98                                     |
| I1345T/V           | 6             | 0.84                                     |
| L1195V/F/V         | 6             | 0.84                                     |
| A1339V             | 5             | 0.70                                     |
| D1099G/H/N         | 5             | 0.70                                     |
| E1172K*/D          | 5             | 0.70                                     |
| G1102C/D/S         | 5             | 0.70                                     |
| P1311L/F           | 5             | 0.70                                     |
| X1087_splice       | 5             | 0.70                                     |
| A1108V/D           | 4             | 0.56                                     |
| A1251T/V           | 4             | 0.56                                     |
| D1133Y/H           | 4             | 0.56                                     |
| E1082K/G           | 4             | 0.56                                     |
| E1306K/*           | 4             | 0.56                                     |

|                 |   |      |
|-----------------|---|------|
| E1314K/G        | 4 | 0.56 |
| G1270S/D        | 4 | 0.56 |
| H1162L/R        | 4 | 0.56 |
| I1292V/K/M      | 4 | 0.56 |
| L1165I/F/V      | 4 | 0.56 |
| L1186F/I/R/V    | 4 | 0.56 |
| N1081S          | 4 | 0.56 |
| N1100D/K/S      | 4 | 0.56 |
| P1305L          | 4 | 0.56 |
| S1122F          | 4 | 0.56 |
| V1092I          | 4 | 0.56 |
| V1155L/M        | 4 | 0.56 |
| V1220I/L        | 4 | 0.56 |
| A1226V/D        | 3 | 0.42 |
| C1308S/W/Y      | 3 | 0.42 |
| E1233K/G        | 3 | 0.42 |
| E1275K          | 3 | 0.42 |
| F1089I/Lfs*21/S | 3 | 0.42 |
| F1124I/L/V      | 3 | 0.42 |
| G1128E/R        | 3 | 0.42 |
| H1088Q/Pfs*14   | 3 | 0.42 |
| H1174R/N        | 3 | 0.42 |
| H1238L/Y        | 3 | 0.42 |
| I1084V          | 3 | 0.42 |
| K1248R          | 3 | 0.42 |
| L1097V/Ffs*5    | 3 | 0.42 |
| L1140F          | 3 | 0.42 |
| L1225I/P/V      | 3 | 0.42 |
| M1192I          | 3 | 0.42 |
| M1211V/T        | 3 | 0.42 |
| M1229V/T        | 3 | 0.42 |
| N1113I/K/Tfs*6  | 3 | 0.42 |
| P1328L          | 3 | 0.42 |
| Q1123*/R        | 3 | 0.42 |
| R1086K/T        | 3 | 0.42 |
| R1279K/I        | 3 | 0.42 |
| S1236R/N        | 3 | 0.42 |
| S1338*/L        | 3 | 0.42 |
| T1096S/I        | 3 | 0.42 |
| V1121A/F        | 3 | 0.42 |
| W1320*/C        | 3 | 0.42 |

|               |   |      |
|---------------|---|------|
| X1114_splice  | 3 | 0.42 |
| X1211_splice  | 3 | 0.42 |
| A1189P/V      | 2 | 0.28 |
| A1281G/V      | 2 | 0.28 |
| A1324S        | 2 | 0.28 |
| C1210G/R      | 2 | 0.28 |
| D1213H/N      | 2 | 0.28 |
| D1231N        | 2 | 0.28 |
| D1286G        | 2 | 0.28 |
| D1291N        | 2 | 0.28 |
| D1310E/G      | 2 | 0.28 |
| E1120*/K      | 2 | 0.28 |
| E1214K        | 2 | 0.28 |
| F1168C/V      | 2 | 0.28 |
| G1085*/E      | 2 | 0.28 |
| G1144E/R      | 2 | 0.28 |
| G1163K/V      | 2 | 0.28 |
| G1183D/V      | 2 | 0.28 |
| G1191D        | 2 | 0.28 |
| G1242D/Kfs*43 | 2 | 0.28 |
| G1280E        | 2 | 0.28 |
| H1106D/N      | 2 | 0.28 |
| H1136R/Y      | 2 | 0.28 |
| I1118T/T      | 2 | 0.28 |
| K1103E/R      | 2 | 0.28 |
| K1104R/T      | 2 | 0.28 |
| K1240R        | 2 | 0.28 |
| L1181C/F      | 2 | 0.28 |
| L1205F/V      | 2 | 0.28 |
| L1245Afs*42/Q | 2 | 0.28 |
| L1273P/R      | 2 | 0.28 |
| L1303I        | 2 | 0.28 |
| L1312V        | 2 | 0.28 |
| L1333P/V      | 2 | 0.28 |
| M1131I        | 2 | 0.28 |
| M1326I/V      | 2 | 0.28 |
| N1138I/K      | 2 | 0.28 |
| P1137H        | 2 | 0.28 |
| R1301I        | 2 | 0.28 |
| S1111C/F      | 2 | 0.28 |
| S1141L/W      | 2 | 0.28 |

|               |   |      |
|---------------|---|------|
| S1197fs/N     | 2 | 0.28 |
| S1254G/N      | 2 | 0.28 |
| S1268F        | 2 | 0.28 |
| S1331A/C      | 2 | 0.28 |
| T1126I/N      | 2 | 0.28 |
| T1173A        | 2 | 0.28 |
| T1177A/Nfs*38 | 2 | 0.28 |
| T1293fs/I     | 2 | 0.28 |
| V1201I/L      | 2 | 0.28 |
| V1294I        | 2 | 0.28 |
| W1274*        | 2 | 0.28 |
| X1175_splice  | 2 | 0.28 |
| X1267_splice  | 2 | 0.28 |
| X1312_splice  | 2 | 0.28 |
| Y1194*/C      | 2 | 0.28 |
| Y1295H/S      | 2 | 0.28 |
| Y1313*/C      | 2 | 0.28 |
| A1207V        | 1 | 0.14 |
| A1221T        | 1 | 0.14 |
| A1243V        | 1 | 0.14 |
| C1091Y        | 1 | 0.14 |
| C1107Y        | 1 | 0.14 |
| C1319*        | 1 | 0.14 |
| D1101N        | 1 | 0.14 |
| D1101V        | 1 | 0.14 |
| D1204N        | 1 | 0.14 |
| D1222V        | 1 | 0.14 |
| E1127D        | 1 | 0.14 |
| E1253D        | 1 | 0.14 |
| E1332K        | 1 | 0.14 |
| F1080fs       | 1 | 0.14 |
| F1134C        | 1 | 0.14 |
| F1184L        | 1 | 0.14 |
| F1216Ifs*7    | 1 | 0.14 |
| F1223V        | 1 | 0.14 |
| F1269Lfs*8    | 1 | 0.14 |
| F1330L        | 1 | 0.14 |
| F1344L        | 1 | 0.14 |
| G1087E        | 1 | 0.14 |
| G1090A        | 1 | 0.14 |
| G1151W        | 1 | 0.14 |

|          |   |      |
|----------|---|------|
| G1185S   | 1 | 0.14 |
| G1224C   | 1 | 0.14 |
| G1299R   | 1 | 0.14 |
| H1321Y   | 1 | 0.14 |
| I1115T   | 1 | 0.14 |
| I1130del | 1 | 0.14 |
| I1182V   | 1 | 0.14 |
| I1337M   | 1 | 0.14 |
| K1132I   | 1 | 0.14 |
| K1179I   | 1 | 0.14 |
| K1190R   | 1 | 0.14 |
| K1219M   | 1 | 0.14 |
| K1244T   | 1 | 0.14 |
| K1259R   | 1 | 0.14 |
| L1212R   | 1 | 0.14 |
| L1296V   | 1 | 0.14 |
| L1317Q   | 1 | 0.14 |
| M1277I   | 1 | 0.14 |
| N1167S   | 1 | 0.14 |
| N1171S   | 1 | 0.14 |
| N1288S   | 1 | 0.14 |
| P1158Q   | 1 | 0.14 |
| P1246L   | 1 | 0.14 |
| P1283S   | 1 | 0.14 |
| P1285S   | 1 | 0.14 |
| P1322L   | 1 | 0.14 |
| Q1256*   | 1 | 0.14 |
| R1114K   | 1 | 0.14 |
| R1208I   | 1 | 0.14 |
| R1227S   | 1 | 0.14 |
| S1135I   | 1 | 0.14 |
| S1149I   | 1 | 0.14 |
| S1152F   | 1 | 0.14 |
| S1329C   | 1 | 0.14 |
| T1116A   | 1 | 0.14 |
| T1217K   | 1 | 0.14 |
| T1257P   | 1 | 0.14 |
| T1262I   | 1 | 0.14 |
| T1289I   | 1 | 0.14 |
| V1078M   | 1 | 0.14 |
| V1083A   | 1 | 0.14 |

|              |   |      |
|--------------|---|------|
| V1109A       | 1 | 0.14 |
| V1139I       | 1 | 0.14 |
| V1178A       | 1 | 0.14 |
| V1188I       | 1 | 0.14 |
| V1315L       | 1 | 0.14 |
| X1311_splice | 1 | 0.14 |
| Y1093C       | 1 | 0.14 |
| Y1159C       | 1 | 0.14 |
| Y1235H       | 1 | 0.14 |
| Y1284F       | 1 | 0.14 |
