# Supplementary material for: Activating Point Mutations in the MET Kinase Domain Represent a Unique Molecular Subset of Lung Cancer and Other Malignancies Targetable with MET Inhibitors
Source: PubMed Central journal article supplement — Cancer Discov. 2024 Apr 2;14(8):1440–56. doi: 10.1158/2159-8290.CD-23-1217 (PMC11294820; doi:10.1158/2159-8290.cd-23-1217), 2024-04-02
Supplement: cd-23-1217_supplementary_table_3_suppst3.pdf [file cd-23-1217_supplementary_table_3_suppst3.pdf]

**Supplementary Table 3.** Frequency of *MET* tyrosine kinase domain (TKD) mutations in cohort #2 according to amino acid residue, out of a total of 2,559 *MET* TKD mutations.

| MET residue                | Number | % out of a total of 2,559 mutations |
|----------------------------|--------|-------------------------------------|
| R1170*/Q/L/G/P             | 125    | 4.88                                |
| R1166Q*/H/L                | 98     | 3.83                                |
| R1148Q*/L                  | 91     | 3.56                                |
| H1094Y/L/R/N/D             | 87     | 3.40                                |
| R1327C/H/P/G/L/_P1328>SQ   | 75     | 2.93                                |
| R1336Q/W/L/_I1337>WL/G/P   | 59     | 2.31                                |
| V1271M/L                   | 55     | 2.15                                |
| E1325K*                    | 44     | 1.72                                |
| Y1230H/C/D*/F/G/N/S        | 40     | 1.56                                |
| D1228N/H/Y/E/_M1229>K      | 38     | 1.48                                |
| L1195V/F/R                 | 38     | 1.48                                |
| G1119E/R*/del/fs*7/K/V     | 27     | 1.06                                |
| G1163E/A/R*/V              | 26     | 1.02                                |
| E1127K*/D/G/Q              | 25     | 0.98                                |
| P1153L/3/2/A               | 25     | 0.98                                |
| D1101N/H/Y/G               | 24     | 0.94                                |
| X1312_splice               | 24     | 0.94                                |
| D1133N/H/Y                 | 23     | 0.90                                |
| M1250T/I/L/V               | 23     | 0.90                                |
| N1081S/T                   | 23     | 0.90                                |
| V1287I/L/A                 | 23     | 0.90                                |
| W1320*/C/R/L               | 20     | 0.78                                |
| E1306K*/T                  | 18     | 0.70                                |
| H1106D/Y/N/fs*11/fs*12     | 18     | 0.70                                |
| P1283S/H/L/T/fs*4/fs*5/I/R | 18     | 0.70                                |
| M1229L/I/V/fs*3/R/T        | 17     | 0.66                                |
| E1314K*/V                  | 16     | 0.63                                |
| P1285S/A                   | 16     | 0.63                                |
| D1180V/Y/H/E/fs*31         | 15     | 0.59                                |
| D1291N/H/A/fs*16/fs*2/V    | 15     | 0.59                                |
| R1086K/T/I/G/S             | 15     | 0.59                                |
| V1092I/L                   | 15     | 0.59                                |
| G1085E//R/V/*A             | 14     | 0.55                                |
| G1151R/E/W/A/V             | 14     | 0.55                                |
| S1141L*/W                  | 14     | 0.55                                |
| V1220A/I/F/G               | 14     | 0.55                                |
| X1174_splice               | 14     | 0.55                                |

|                              |    |      |
|------------------------------|----|------|
| D1099N/E/fs*11/G             | 13 | 0.51 |
| E1214K*/G/Q                  | 13 | 0.51 |
| E1275K*/>LLWK/Q              | 13 | 0.51 |
| M1211V/fs*36/I               | 13 | 0.51 |
| R1301K/T*/I                  | 13 | 0.51 |
| S1236R/N/T/C/G/I             | 13 | 0.51 |
| A1108V/D/T                   | 12 | 0.47 |
| F1200I/L/V/C/fs*15/Y         | 12 | 0.47 |
| K1199fs*49/M/fs*14/fs*15/N/R | 12 | 0.47 |
| L1165I/F/V/P                 | 12 | 0.47 |
| P1311L/S/H/R/T               | 12 | 0.47 |
| X1211_splice                 | 12 | 0.47 |
| D1164N/G/Y/H                 | 11 | 0.43 |
| G1280E/2/fs*6/R/V            | 11 | 0.43 |
| M1131I/V                     | 11 | 0.43 |
| M1277I/del/L/V               | 11 | 0.43 |
| R1227K/T/G/fs*21/I/S         | 11 | 0.43 |
| S1268F/C/P/T                 | 11 | 0.43 |
| S1329F/fs*23/T/Y             | 11 | 0.43 |
| X1266_splice                 | 11 | 0.43 |
| D1222N/A/Y/E/fs*26           | 10 | 0.39 |
| E1082K*/D/G                  | 10 | 0.39 |
| F1080L/S/fs*17/V             | 10 | 0.39 |
| G1144R/E/V                   | 10 | 0.39 |
| I1292V/M/R/T                 | 10 | 0.39 |
| M1160I/3/L/V                 | 10 | 0.39 |
| P1328L/S/Q                   | 10 | 0.39 |
| S1135N/R/C/I/T               | 10 | 0.39 |
| T1343A/I/N/S                 | 10 | 0.39 |
| X1086_splice                 | 10 | 0.39 |
| A1281T/V/D/S                 | 9  | 0.35 |
| D1286H/N/Y/G/_T1293del       | 9  | 0.35 |
| E1172*/K/Q                   | 9  | 0.35 |
| E1253K*/fs*24/G/Q            | 9  | 0.35 |
| E1332K*/1                    | 9  | 0.35 |
| F1168L/_N1171del/S           | 9  | 0.35 |
| G1128E/R*/A/fs*4             | 9  | 0.35 |
| I1084M/L/T                   | 9  | 0.35 |
| I1105L/F/M/N/S               | 9  | 0.35 |
| L1181R/I/F/P/V               | 9  | 0.35 |
| P1137S/H/L/T                 | 9  | 0.35 |

|                               |   |      |
|-------------------------------|---|------|
| S1111F/Y/fs*2                 | 9 | 0.35 |
| S1122F/I/Y                    | 9 | 0.35 |
| S1152F/G/Y/P/T                | 9 | 0.35 |
| W1274*/L/F                    | 9 | 0.35 |
| A1226S/fs*6/fs*22/P/T/V       | 8 | 0.31 |
| C1146Y/fs*16*/F/W             | 8 | 0.31 |
| E1120D/K/*                    | 8 | 0.31 |
| F1341L/I/S/V                  | 8 | 0.31 |
| G1090S/V/C/D/F/fs*19          | 8 | 0.31 |
| I1182T/_G1183insl/del/L/M/S/V | 8 | 0.31 |
| K1215I/N/T/R                  | 8 | 0.31 |
| L1205V/_A1207>T/M/S           | 8 | 0.31 |
| M1192I/V                      | 8 | 0.31 |
| M1326I/R/T                    | 8 | 0.31 |
| N1100T/D/H/I/K/S/Y            | 8 | 0.31 |
| P1282S/L/Q/fs*6               | 8 | 0.31 |
| P1322S/A/L                    | 8 | 0.31 |
| R1208K/fs*6/G/T               | 8 | 0.31 |
| S1331F/A/fs*2/P               | 8 | 0.31 |
| T1289I/A/N/S                  | 8 | 0.31 |
| W1267*/C/fs*10/fs*8/L         | 8 | 0.31 |
| A1206V/S/fs*42/T              | 7 | 0.27 |
| A1207E/G/S/T/V                | 7 | 0.27 |
| D1117N/G/H                    | 7 | 0.27 |
| D1213H/del/V/Y                | 7 | 0.27 |
| G1087W/R/A/V                  | 7 | 0.27 |
| G1183S/C/I/V                  | 7 | 0.27 |
| G1242D/V/C/R/S                | 7 | 0.27 |
| G1299E/R                      | 7 | 0.27 |
| H1079Y/P/L                    | 7 | 0.27 |
| H1136Y/N/Q/R                  | 7 | 0.27 |
| L1097F/V/fs*10/V              | 7 | 0.27 |
| L1140F/V                      | 7 | 0.27 |
| L1302P/_L1303>RLL/F/H/I/V     | 7 | 0.27 |
| Q1187*/P/R                    | 7 | 0.27 |
| R1203I/fs*12/K/T              | 7 | 0.27 |
| R1279T/G/I/K/S                | 7 | 0.27 |
| T1217A/fs*5/I/K               | 7 | 0.27 |
| V1109L/E/fs*1/I/M             | 7 | 0.27 |
| V1237I/A/E/L                  | 7 | 0.27 |
| Y1093C/N*/D                   | 7 | 0.27 |

|                            |   |      |
|----------------------------|---|------|
| A1324V/T/S                 | 6 | 0.23 |
| E1150K/*                   | 6 | 0.23 |
| E1233K/Q*/G                | 6 | 0.23 |
| F1216L/I                   | 6 | 0.23 |
| F1260L/C/fs*27             | 6 | 0.23 |
| G1095E/V                   | 6 | 0.23 |
| G1185fs*30/C/D/fs*4/S      | 6 | 0.23 |
| G1224S/A/C/D/R             | 6 | 0.23 |
| G1270S/D/C                 | 6 | 0.23 |
| K1259fs*18/T/M/V           | 6 | 0.23 |
| Q1123*/H/K/R               | 6 | 0.23 |
| Q1258E/L/fs*15/K           | 6 | 0.23 |
| S1264*/L                   | 6 | 0.23 |
| T1126I/S                   | 6 | 0.23 |
| T1261A/S/I/N               | 6 | 0.23 |
| V1083I/_I1084>EL/F/fs*24/L | 6 | 0.23 |
| V1139I/A/F/G               | 6 | 0.23 |
| V1218I/A/F/fs*27/L         | 6 | 0.23 |
| V1334A/L/_F1344del/M       | 6 | 0.23 |
| W1249*/C/R                 | 6 | 0.23 |
| Y1194C/fs*22/H             | 6 | 0.23 |
| Y1234*/C/fs*3/H            | 6 | 0.23 |
| Y1295H*/C/F/S              | 6 | 0.23 |
| A1243E/T/V                 | 5 | 0.20 |
| A1251D/T                   | 5 | 0.20 |
| C1210S/fs*4/F/R            | 5 | 0.20 |
| C1319Y/F                   | 5 | 0.20 |
| F1330C/fs*3/L/V/Y          | 5 | 0.20 |
| F1344fs*9/L/S              | 5 | 0.20 |
| G1191D/S/R                 | 5 | 0.20 |
| H1088R/Q                   | 5 | 0.20 |
| H1174Y/D/fs*5/N            | 5 | 0.20 |
| H1238R/D/L/Y               | 5 | 0.20 |
| H1321Y/N/Q                 | 5 | 0.20 |
| I1130del/M                 | 5 | 0.20 |
| I1337V/K/L/M               | 5 | 0.20 |
| K1179N/E                   | 5 | 0.20 |
| K1244N/E/M                 | 5 | 0.20 |
| K1263E*/M                  | 5 | 0.20 |
| K1323E/R/I                 | 5 | 0.20 |
| L1273F/R                   | 5 | 0.20 |

|                      |   |      |
|----------------------|---|------|
| L1312F/*             | 5 | 0.20 |
| L1333P/M/R           | 5 | 0.20 |
| P1158L/S/Q           | 5 | 0.20 |
| P1176L/S/T           | 5 | 0.20 |
| P1305L               | 5 | 0.20 |
| R1114K               | 5 | 0.20 |
| R1300*/G/I/K         | 5 | 0.20 |
| S1342F/C/P           | 5 | 0.20 |
| T1262A/S             | 5 | 0.20 |
| V1294A/fs*20/fs*22/L | 5 | 0.20 |
| X1113_splice         | 5 | 0.20 |
| X1311_splice         | 5 | 0.20 |
| A1196T/P/V           | 4 | 0.16 |
| A1221S/T/V           | 4 | 0.16 |
| D1231N/Y             | 4 | 0.16 |
| D1265H/N             | 4 | 0.16 |
| F1223C/S/V/Y         | 4 | 0.16 |
| I1115L/M/T/V         | 4 | 0.16 |
| I1145M/N/V           | 4 | 0.16 |
| I1169F/L/M           | 4 | 0.16 |
| K1103E/N/R           | 4 | 0.16 |
| K1219N*/E            | 4 | 0.16 |
| K1232N/E/T           | 4 | 0.16 |
| L1112F               | 4 | 0.16 |
| L1125V               | 4 | 0.16 |
| L1142F/I             | 4 | 0.16 |
| L1186F/R/V           | 4 | 0.16 |
| L1225V/F/I           | 4 | 0.16 |
| L1296F/fs*20/V       | 4 | 0.16 |
| L1303I/del           | 4 | 0.16 |
| L1317Q/P/R           | 4 | 0.16 |
| N1167D/fs*12/fs*6/T  | 4 | 0.16 |
| N1288D/I/S/Y         | 4 | 0.16 |
| S1197R/G/T           | 4 | 0.16 |
| S1338L/*             | 4 | 0.16 |
| T1173I/N/S           | 4 | 0.16 |
| T1293A/fs*14/fs*21/I | 4 | 0.16 |
| V1156I/A             | 4 | 0.16 |
| V1188L/F/I           | 4 | 0.16 |
| V1315I/L             | 4 | 0.16 |
| Y1159F/C/H           | 4 | 0.16 |

|                  |   |      |
|------------------|---|------|
| A1339V/_I1340>AI | 3 | 0.12 |
| C1107R/S/W       | 3 | 0.12 |
| C1308Y/F         | 3 | 0.12 |
| D1310H/Y         | 3 | 0.12 |
| F1134C/fs*27/I   | 3 | 0.12 |
| G1102D/S         | 3 | 0.12 |
| H1202fs*12/L/Y   | 3 | 0.12 |
| I1129N/fs*2      | 3 | 0.12 |
| I1340V/M         | 3 | 0.12 |
| I1345V           | 3 | 0.12 |
| K1110fs*3/I/N    | 3 | 0.12 |
| K1161fs*18/I/R   | 3 | 0.12 |
| K1193E/N         | 3 | 0.12 |
| K1248T/N         | 3 | 0.12 |
| L1143M/Q/V       | 3 | 0.12 |
| L1147P/M         | 3 | 0.12 |
| L1157I/P/V       | 3 | 0.12 |
| L1255M/V         | 3 | 0.12 |
| M1316I/T         | 3 | 0.12 |
| N1209D/K/S       | 3 | 0.12 |
| N1239S           | 3 | 0.12 |
| Q1298*/H/R       | 3 | 0.12 |
| Q1304P/*         | 3 | 0.12 |
| S1254I/R/T       | 3 | 0.12 |
| S1335F/P         | 3 | 0.12 |
| T1096I/S         | 3 | 0.12 |
| T1241fs*7/I/R    | 3 | 0.12 |
| T1278A/I/K       | 3 | 0.12 |
| V1155M/A         | 3 | 0.12 |
| A1189S/V         | 2 | 0.08 |
| C1091R/Y         | 2 | 0.08 |
| F1089fs*16/fs*21 | 2 | 0.08 |
| F1124L           | 2 | 0.08 |
| F1290C/V         | 2 | 0.08 |
| H1162L/N         | 2 | 0.08 |
| I1118T           | 2 | 0.08 |
| K1104E/N         | 2 | 0.08 |
| K1132E/N         | 2 | 0.08 |
| K1240I/R         | 2 | 0.08 |
| K1318*/I         | 2 | 0.08 |
| L1098*/F         | 2 | 0.08 |

|              |   |      |
|--------------|---|------|
| L1212P/V     | 2 | 0.08 |
| L1252F/fs*25 | 2 | 0.08 |
| L1272F/H     | 2 | 0.08 |
| L1276P/V     | 2 | 0.08 |
| L1297F       | 2 | 0.08 |
| N1138D/S     | 2 | 0.08 |
| Q1256K/R     | 2 | 0.08 |
| S1149N/R     | 2 | 0.08 |
| T1116A/P     | 2 | 0.08 |
| V1178A/E     | 2 | 0.08 |
| V1201A/F     | 2 | 0.08 |
| V1247L       | 2 | 0.08 |
| V1266del/M   | 2 | 0.08 |
| Y1235C/fs*1  | 2 | 0.08 |
| Y1284F       | 2 | 0.08 |
| Y1307*/F     | 2 | 0.08 |
| Y1313C       | 2 | 0.08 |
| D1204E       | 1 | 0.04 |
| F1184L       | 1 | 0.04 |
| F1269fs*17   | 1 | 0.04 |
| K1190N       | 1 | 0.04 |
| K1198I       | 1 | 0.04 |
| L1154R       | 1 | 0.04 |
| L1245M       | 1 | 0.04 |
| N1113S       | 1 | 0.04 |
| N1171S       | 1 | 0.04 |
| P1246L       | 1 | 0.04 |
| P1309S       | 1 | 0.04 |
| T1177S       | 1 | 0.04 |
| T1257S       | 1 | 0.04 |
| V1078G       | 1 | 0.04 |
| X1302_splice | 1 | 0.04 |
