# Supplementary material for: Activating Point Mutations in the MET Kinase Domain Represent a Unique Molecular Subset of Lung Cancer and Other Malignancies Targetable with MET Inhibitors
Source: PubMed Central journal article supplement — Cancer Discov. 2024 Apr 2;14(8):1440–56. doi: 10.1158/2159-8290.CD-23-1217 (PMC11294820; doi:10.1158/2159-8290.cd-23-1217), 2024-04-02
Supplement: cd-23-1217_supplementary_table_6_suppst6.pdf [file cd-23-1217_supplementary_table_6_suppst6.pdf]

**Supplementary Table 6.** Prevalence of *MET* tyrosine kinase domain (TKD) mutations across cancer types in cohort #1.

| Cancer Type              | Oncogenic / likely oncogenic <i>MET</i> TKD mutations (N) | Oncogenic / likely oncogenic <i>MET</i> TKD mutations (%) | <i>MET</i> TKD mutations of unknown biological function (N) | <i>MET</i> TKD mutations of unknown biological function (%) | Total <i>MET</i> TKD mutations (N) | Total <i>MET</i> TKD mutations (%) | Total (N) |
|--------------------------|-----------------------------------------------------------|-----------------------------------------------------------|-------------------------------------------------------------|-------------------------------------------------------------|------------------------------------|------------------------------------|-----------|
| Melanoma                 | 7                                                         | 0.12                                                      | 82                                                          | 1.39                                                        | 89                                 | 1.50                               | 5,916     |
| Renal Cancer             | 34                                                        | 1.05                                                      | 9                                                           | 0.28                                                        | 43                                 | 1.33                               | 3,226     |
| Uterine Cancer           | 4                                                         | 0.08                                                      | 60                                                          | 1.13                                                        | 64                                 | 1.20                               | 5,330     |
| Other Skin Cancer        | 0                                                         | 0                                                         | 10                                                          | 1.03                                                        | 10                                 | 1.03                               | 973       |
| Neuroendocrine Cancer    | 0                                                         | 0                                                         | 7                                                           | 0.78                                                        | 8                                  | 0.90                               | 893       |
| SCLC                     | 0                                                         | 0                                                         | 3                                                           | 0.78                                                        | 3                                  | 0.78                               | 383       |
| Colorectal Cancer        | 1                                                         | 0.01                                                      | 89                                                          | 0.60                                                        | 90                                 | 0.61                               | 14,795    |
| Bladder Cancer           | 1                                                         | 0.03                                                      | 17                                                          | 0.52                                                        | 18                                 | 0.55                               | 3,246     |
| NSCLC                    | 44                                                        | 0.19                                                      | 76                                                          | 0.33                                                        | 120                                | 0.52                               | 23,195    |
| CUP                      | 2                                                         | 0.17                                                      | 4                                                           | 0.34                                                        | 6                                  | 0.51                               | 1,184     |
| GU Others                | 0                                                         | 0                                                         | 3                                                           | 0.51                                                        | 3                                  | 0.51                               | 592       |
| Head And Neck Cancer     | 0                                                         | 0                                                         | 12                                                          | 0.47                                                        | 12                                 | 0.47                               | 2,536     |
| Other Gynecologic Cancer | 0                                                         | 0                                                         | 4                                                           | 0.46                                                        | 4                                  | 0.46                               | 869       |
| Brain Cancer             | 0                                                         | 0                                                         | 45                                                          | 0.45                                                        | 45                                 | 0.45                               | 10,007    |
| Gastric Cancer           | 1                                                         | 0.04                                                      | 8                                                           | 0.35                                                        | 9                                  | 0.40                               | 2,266     |
| Esophageal Cancer        | 2                                                         | 0.06                                                      | 9                                                           | 0.27                                                        | 11                                 | 0.34                               | 3,280     |
| GIST                     | 1                                                         | 0.08                                                      | 3                                                           | 0.24                                                        | 4                                  | 0.32                               | 1,236     |
| Ovarian Cancer           | 2                                                         | 0.03                                                      | 16                                                          | 0.26                                                        | 18                                 | 0.29                               | 6,105     |
| Liver                    | 1                                                         | 0.05                                                      | 5                                                           | 0.24                                                        | 6                                  | 0.29                               | 2,042     |
| Prostatic Cancer         | 0                                                         | 0                                                         | 12                                                          | 0.25                                                        | 12                                 | 0.25                               | 4,827     |
| Breast Cancer            | 0                                                         | 0                                                         | 30                                                          | 0.24                                                        | 30                                 | 0.24                               | 12,375    |
| Sarcoma                  | 1                                                         | 0.02                                                      | 10                                                          | 0.21                                                        | 11                                 | 0.23                               | 4,704     |
| Biliary Tract Cancer     | 2                                                         | 0.06                                                      | 5                                                           | 0.15                                                        | 7                                  | 0.21                               | 3,293     |
| Other Cancers*           | 1                                                         | 0.01                                                      | 18                                                          | 0.16                                                        | 19                                 | 0.17                               | 11,442    |
| Pancreatic Cancer        | 1                                                         | 0.02                                                      | 8                                                           | 0.14                                                        | 9                                  | 0.16                               | 5,676     |
| Blood Cancer             | 0                                                         | 0                                                         | 12                                                          | 0.15                                                        | 12                                 | 0.15                               | 8,135     |
| Other GI Cancer          | 0                                                         | 0                                                         | 1                                                           | 0.08                                                        | 1                                  | 0.08                               | 1,248     |

Abbreviations: CUP, cancer of unknown primary; SCLC, small cell lung cancer; NSCLC, non-small cell lung cancer; GU, genitourinary; GIST, gastrointestinal stromal tumors; GI, gastrointestinal; NOS, not otherwise specified. \*Other cancers are detailed in Supplementary Table 7.
