# Supplementary material for: Activating Point Mutations in the MET Kinase Domain Represent a Unique Molecular Subset of Lung Cancer and Other Malignancies Targetable with MET Inhibitors
Source: PubMed Central journal article supplement — Cancer Discov. 2024 Apr 2;14(8):1440–56. doi: 10.1158/2159-8290.CD-23-1217 (PMC11294820; doi:10.1158/2159-8290.cd-23-1217), 2024-04-02
Supplement: cd-23-1217_supplementary_table_7_suppst7.pdf [file cd-23-1217_supplementary_table_7_suppst7.pdf]

**Supplementary Table 7.** Prevalence of *MET* tyrosine kinase domain (TKD) mutations among “other cancers” from Supplementary Table 6.

| Cancer Type                             | Oncogenic / likely oncogenic <i>MET</i> TKD mutations (N) | Oncogenic / likely oncogenic <i>MET</i> TKD mutations (%) | <i>MET</i> TKD mutations of unknown biological function (N) | <i>MET</i> TKD mutations of unknown biological function (%) | Total <i>MET</i> TKD mutations (N) | Total <i>MET</i> TKD mutations (%) | Total (N) |
|-----------------------------------------|-----------------------------------------------------------|-----------------------------------------------------------|-------------------------------------------------------------|-------------------------------------------------------------|------------------------------------|------------------------------------|-----------|
| Adenocarcinoma, NOS                     | 1                                                         | 0.09                                                      | 1                                                           | 0.09                                                        | 2                                  | 0.17                               | 1,160     |
| Poorly Differentiated Carcinoma, NOS    | 0                                                         | 0                                                         | 2                                                           | 0.46                                                        | 2                                  | 0.46                               | 436       |
| Sellar Tumor, NOS                       | 0                                                         | 0                                                         | 1                                                           | 12.50                                                       | 1                                  | 12.50                              | 8         |
| Squamous Cell Carcinoma, NOS            | 0                                                         | 0                                                         | 2                                                           | 0.65                                                        | 2                                  | 0.65                               | 306       |
| Chondroblastoma                         | 0                                                         | 0                                                         | 1                                                           | 33.33                                                       | 1                                  | 33.33                              | 3         |
| Extramammary Paget Disease              | 0                                                         | 0                                                         | 1                                                           | 16.67                                                       | 1                                  | 16.67                              | 6         |
| Medulloblastoma                         | 0                                                         | 0                                                         | 1                                                           | 0.34                                                        | 1                                  | 0.34                               | 292       |
| Papillary Thyroid Cancer                | 0                                                         | 0                                                         | 2                                                           | 0.19                                                        | 2                                  | 0.19                               | 1,056     |
| Yolk Sac Tumor                          | 0                                                         | 0                                                         | 1                                                           | 1.10                                                        | 1                                  | 1.10                               | 91        |
| Germinoma                               | 0                                                         | 0                                                         | 1                                                           | 7.69                                                        | 1                                  | 7.69                               | 13        |
| Adrenocortical Carcinoma                | 0                                                         | 0                                                         | 1                                                           | 0.48                                                        | 1                                  | 0.48                               | 210       |
| Granulosa Cell Tumor                    | 0                                                         | 0                                                         | 1                                                           | 0.72                                                        | 1                                  | 0.72                               | 139       |
| Pleural Mesothelioma                    | 0                                                         | 0                                                         | 2                                                           | 0.28                                                        | 2                                  | 0.28                               | 712       |
| Malignant Peripheral Nerve Sheath Tumor | 0                                                         | 0                                                         | 1                                                           | 0.69                                                        | 1                                  | 0.69                               | 145       |

Abbreviation: NOS: not otherwise specified.
