# Supplementary material for: Activating Point Mutations in the MET Kinase Domain Represent a Unique Molecular Subset of Lung Cancer and Other Malignancies Targetable with MET Inhibitors
Source: PubMed Central journal article supplement — Cancer Discov. 2024 Apr 2;14(8):1440–56. doi: 10.1158/2159-8290.CD-23-1217 (PMC11294820; doi:10.1158/2159-8290.cd-23-1217), 2024-04-02
Supplement: cd-23-1217_supplementary_table_8_suppst8.pdf [file cd-23-1217_supplementary_table_8_suppst8.pdf]

**Supplementary Table 8.** Prevalence of *MET* tyrosine kinase domain (TKD) mutations across cancer types in cohort #2.

| Cancer Type              | Oncogenic / likely oncogenic <i>MET</i> TKD mutations (N) | Oncogenic / likely oncogenic <i>MET</i> TKD mutations (%) | <i>MET</i> TKD mutations of unknown biological function (N) | <i>MET</i> TKD mutations of unknown biological function (%) | Total <i>MET</i> TKD mutations (N) | Total <i>MET</i> TKD mutations (%) | Total (N) |
|--------------------------|-----------------------------------------------------------|-----------------------------------------------------------|-------------------------------------------------------------|-------------------------------------------------------------|------------------------------------|------------------------------------|-----------|
| Melanoma                 | 18                                                        | 0.14                                                      | 303                                                         | 2.32                                                        | 321                                | 2.46                               | 13,055    |
| Other Skin Cancer        | 1                                                         | 0.05                                                      | 37                                                          | 1.80                                                        | 38                                 | 1.85                               | 2,051     |
| Renal Cancer             | 57                                                        | 0.72                                                      | 28                                                          | 0.35                                                        | 85                                 | 1.07                               | 7,961     |
| Uterine Cancer           | 7                                                         | 0.04                                                      | 113                                                         | 0.72                                                        | 120                                | 0.76                               | 15,767    |
| Bladder Cancer           | 7                                                         | 0.07                                                      | 62                                                          | 0.63                                                        | 69                                 | 0.70                               | 9,898     |
| NSCLC                    | 129                                                       | 0.14                                                      | 457                                                         | 0.49                                                        | 586                                | 0.63                               | 92,406    |
| Other GI Cancer          | 4                                                         | 0.06                                                      | 34                                                          | 0.52                                                        | 38                                 | 0.59                               | 6,478     |
| Head And Neck Cancer     | 4                                                         | 0.05                                                      | 39                                                          | 0.50                                                        | 43                                 | 0.55                               | 7,791     |
| Colorectal Cancer        | 9                                                         | 0.02                                                      | 285                                                         | 0.52                                                        | 294                                | 0.53                               | 55,274    |
| Prostate Cancer          | 4                                                         | 0.02                                                      | 136                                                         | 0.51                                                        | 140                                | 0.53                               | 26,503    |
| Gastric Cancer           | 5                                                         | 0.06                                                      | 35                                                          | 0.45                                                        | 40                                 | 0.52                               | 7,698     |
| SCLC                     | 3                                                         | 0.06                                                      | 23                                                          | 0.44                                                        | 26                                 | 0.50                               | 5,186     |
| CUP                      | 21                                                        | 0.09                                                      | 97                                                          | 0.41                                                        | 118                                | 0.50                               | 23,771    |
| Neuroendocrine Cancer    | 1                                                         | 0.02                                                      | 26                                                          | 0.44                                                        | 27                                 | 0.46                               | 5,927     |
| Brain Cancer             | 1                                                         | 0.01                                                      | 68                                                          | 0.44                                                        | 68                                 | 0.44                               | 15,457    |
| Sarcoma                  | 0                                                         | 0                                                         | 5                                                           | 0.36                                                        | 5                                  | 0.36                               | 1,406     |
| Breast Cancer            | 3                                                         | 0.01                                                      | 170                                                         | 0.35                                                        | 173                                | 0.36                               | 48,675    |
| Other Cancers*           | 5                                                         | 0.03                                                      | 52                                                          | 0.30                                                        | 57                                 | 0.32                               | 17,625    |
| Other Gynecologic Cancer | 1                                                         | 0.01                                                      | 23                                                          | 0.30                                                        | 24                                 | 0.32                               | 7,583     |
| Esophageal Cancer        | 5                                                         | 0.04                                                      | 32                                                          | 0.25                                                        | 37                                 | 0.29                               | 12,557    |
| GU Others                | 0                                                         | 0                                                         | 4                                                           | 0.28                                                        | 4                                  | 0.28                               | 1,447     |
| Biliary Tract Cancer     | 1                                                         | 0.01                                                      | 33                                                          | 0.26                                                        | 34                                 | 0.26                               | 12,894    |
| Ovarian Cancer           | 5                                                         | 0.02                                                      | 59                                                          | 0.23                                                        | 64                                 | 0.25                               | 25,783    |
| Liver Cancer             | 1                                                         | 0.04                                                      | 5                                                           | 0.21                                                        | 6                                  | 0.25                               | 2,433     |
| Pancreatic Cancer        | 8                                                         | 0.03                                                      | 49                                                          | 0.17                                                        | 57                                 | 0.19                               | 29,509    |
| GIST                     | 0                                                         | 0                                                         | 3                                                           | 0.15                                                        | 3                                  | 0.15                               | 2,032     |

Abbreviations: CUP, cancer of unknown primary; HCC, hepatocellular carcinoma; SCLC, small cell lung cancer; NSCLC, non-small cell lung cancer; GU, genitourinary; GIST, gastrointestinal stromal tumors; GI, gastrointestinal; NOS, not otherwise specified

\*Other cancers are detailed in Supplementary Table 9.
