# Supplementary material for: Activating Point Mutations in the MET Kinase Domain Represent a Unique Molecular Subset of Lung Cancer and Other Malignancies Targetable with MET Inhibitors
Source: PubMed Central journal article supplement — Cancer Discov. 2024 Apr 2;14(8):1440–56. doi: 10.1158/2159-8290.CD-23-1217 (PMC11294820; doi:10.1158/2159-8290.cd-23-1217), 2024-04-02
Supplement: cd-23-1217_supplementary_table_9_suppst9.pdf [file cd-23-1217_supplementary_table_9_suppst9.pdf]

**Supplementary Table 9.** Prevalence of *MET* tyrosine kinase domain (TKD) mutations across tumor in “other cancers” from Supplementary Table 8.

| Cancer Type               | Oncogenic / likely oncogenic <i>MET</i> TKD mutations (N) | Oncogenic / likely oncogenic <i>MET</i> TKD mutations (%) | <i>MET</i> TKD mutations of unknown biological function (N) | <i>MET</i> TKD mutations of unknown biological function (%) | Total <i>MET</i> TKD mutations (N) | Total <i>MET</i> TKD mutations (%) | Total (N) |
|---------------------------|-----------------------------------------------------------|-----------------------------------------------------------|-------------------------------------------------------------|-------------------------------------------------------------|------------------------------------|------------------------------------|-----------|
| Endocrine                 | 1                                                         | 0.05                                                      | 8                                                           | 0.40                                                        | 9                                  | 0.45                               | 2,011     |
| Lung Cancer NOS           | 2                                                         | 0.10                                                      | 17                                                          | 0.89                                                        | 19                                 | 0.99                               | 1,918     |
| Pituitary Gland           | 0                                                         | 0                                                         | 1                                                           | 1.67                                                        | 1                                  | 1.67                               | 60        |
| Thymus                    | 0                                                         | 0                                                         | 3                                                           | 0.64                                                        | 3                                  | 0.64                               | 466       |
| Salivary Gland            | 1                                                         | 0.06                                                      | 7                                                           | 0.41                                                        | 8                                  | 0.47                               | 1,720     |
| Peripheral Nervous System | 0                                                         | 0                                                         | 2                                                           | 0.30                                                        | 2                                  | 0.30                               | 675       |
| Germ Cell                 | 0                                                         | 0                                                         | 2                                                           | 0.29                                                        | 2                                  | 0.29                               | 696       |
| Peritoneum                | 0                                                         | 0                                                         | 3                                                           | 0.21                                                        | 3                                  | 0.21                               | 1,412     |
| Adenoid Cystic Carcinoma  | 1                                                         | 0.06                                                      | 2                                                           | 0.13                                                        | 3                                  | 0.19                               | 1,551     |
| Adrenal Gland             | 0                                                         | 0                                                         | 1                                                           | 0.15                                                        | 1                                  | 0.15                               | 672       |
| Thyroid                   | 0                                                         | 0                                                         | 4                                                           | 0.11                                                        | 4                                  | 0.11                               | 3,779     |
| Carcinoid                 | 0                                                         | 0                                                         | 1                                                           | 0.10                                                        | 1                                  | 0.10                               | 983       |
| Mesothelioma              | 0                                                         | 0                                                         | 1                                                           | 0.06                                                        | 1                                  | 0.06                               | 1,682     |

Abbreviation: NOS, not otherwise specified
