# Supplementary material for: Activating Point Mutations in the MET Kinase Domain Represent a Unique Molecular Subset of Lung Cancer and Other Malignancies Targetable with MET Inhibitors
Source: PubMed Central journal article supplement — Cancer Discov. 2024 Apr 2;14(8):1440–56. doi: 10.1158/2159-8290.CD-23-1217 (PMC11294820; doi:10.1158/2159-8290.cd-23-1217), 2024-04-02
Supplement: cd-23-1217_supplementary_table_10_suppst10.pdf [file cd-23-1217_supplementary_table_10_suppst10.pdf]

**Supplementary Table 10.** Characteristics of 44 NSCLC cases harboring oncogenic / likely oncogenic *MET* TKD mutations in cohort #1.

| <b>Characteristic</b>                                 | <b>Total<br/>(N=44)</b> |
|-------------------------------------------------------|-------------------------|
| <b>Age</b>                                            |                         |
| Median (range)                                        | 63 (30-89)              |
| <b>Sex</b>                                            |                         |
| Female                                                | 27 (61%)                |
| Male                                                  | 17 (39%)                |
| <b>Ethnicity</b>                                      |                         |
| White                                                 | 27 (66%)                |
| Asian                                                 | 13 (32%)                |
| Black or African American                             | 1 (2%)                  |
| NA                                                    | 3                       |
| <b>Histology</b>                                      |                         |
| Adenocarcinoma                                        | 39 (90%)                |
| Squamous Cell Carcinoma                               | 3 (3%)                  |
| Poorly Differentiated Carcinoma                       | 2 (7%)                  |
| <b>Stage at <i>MET</i> TKD mutation<br/>detection</b> |                         |
| I                                                     | 2 (6%)                  |
| II                                                    | 2 (6%)                  |
| III                                                   | 5 (15%)                 |
| IV                                                    | 25 (73%)                |
| NA                                                    | 10                      |

Abbreviation: NA, not available
