# Supplementary material for: Activating Point Mutations in the MET Kinase Domain Represent a Unique Molecular Subset of Lung Cancer and Other Malignancies Targetable with MET Inhibitors
Source: PubMed Central journal article supplement — Cancer Discov. 2024 Apr 2;14(8):1440–56. doi: 10.1158/2159-8290.CD-23-1217 (PMC11294820; doi:10.1158/2159-8290.cd-23-1217), 2024-04-02
Supplement: cd-23-1217_supplementary_table_11_suppst11.pdf [file cd-23-1217_supplementary_table_11_suppst11.pdf]

**Supplementary Table 11.** Detailed genomic characteristics for each case of NSCLC with oncogenic / likely oncogenic *MET* tyrosine kinase domain (TKD) mutations in cohort #1.

| Treatment annotations | Patient ID | Histologic subtype          | MET TKD mutation | <i>MET</i> amplification | Other driver alterations |
|-----------------------|------------|-----------------------------|------------------|--------------------------|--------------------------|
| Unknown               | #1         | Lung squamous               | D1228N           | NA                       | No                       |
| Unknown               | #2         | Lung Adenocarcinoma         | D1228N           | <i>MET</i> amplified     | CD74-ROS1                |
| Unknown               | #3         | Lung Adenocarcinoma         | H1094D           | NA                       | No                       |
| Unknown               | #4         | Lung squamous               | H1094R           | No                       | No                       |
| Unknown               | #5         | Lung Adenocarcinoma         | H1094Y           | NA                       | No                       |
| Unknown               | #6         | Lung Adenocarcinoma         | H1094Y           | NA                       | No                       |
| Unknown               | #7         | Lung Adenocarcinoma         | H1094Y           | No                       | KRAS G12V                |
| Unknown               | #8         | Lung Adenocarcinoma         | M1250T           | No                       | KRAS G12C                |
| Unknown               | #9         | Lung Adenocarcinoma         | H1094D           | No                       | No                       |
| Unknown               | #10        | Lung Adenocarcinoma         | V1220L           | No                       | KRAS G12C                |
| Unknown               | #11        | Lung Adenocarcinoma         | Y1230H           | <i>MET</i> amplified     | No                       |
| Unknown               | #12        | Lung Adenocarcinoma         | Y1230N           | <i>MET</i> amplified     | No                       |
| Unknown               | #13        | Lung Adenocarcinoma         | Y1235H           | No                       | No                       |
| Unknown               | #14        | Lung Adenocarcinoma         | D1228N           | No                       | KRAS G12F                |
| Unknown               | #15        | Lung Adenocarcinoma         | D1228N           | No                       | CD74-ROS1                |
| Known                 | #16        | Lung squamous               | D1228H           | <i>MET</i> amplified     | No                       |
| Known                 | #17        | Lung Adenocarcinoma         | D1228N, Y1230H   | <i>MET</i> amplified     | No                       |
| Known                 | #18        | Lung Adenocarcinoma         | D1228V           | <i>MET</i> amplified     | EGFR exon 19 deletion    |
| Known                 | #19        | Lung Adenocarcinoma         | D1228Y           | <i>MET</i> amplified     | EGFR L858R               |
| Known                 | #20        | Lung Adenocarcinoma         | F1200I           | No                       | No                       |
| Known                 | #21        | Poorly Differentiated NSCLC | H1106D           | No                       | No                       |
| Known                 | #22        | Lung Adenocarcinoma         | V1188I           | No                       | No                       |
| Known                 | #23        | Lung Adenocarcinoma         | V1220I           | No                       | No                       |
| Known                 | #24        | Lung Adenocarcinoma         | V1220L           | No                       | KRAS G12C                |
| Known                 | #25        | Lung Adenocarcinoma         | Y1230H           | <i>MET</i> amplified     | No                       |
| Known                 | #26        | Lung Adenocarcinoma         | D1228G           | No                       | HLA-DRB1-MET fusion      |
| Known                 | #27        | Lung Adenocarcinoma         | D1228H           | No                       | KRAS G12C                |
| Known                 | #28        | Lung Adenocarcinoma         | D1228N           | No                       | EGFR exon 19 deletion    |
| Known                 | #29        | Lung Adenocarcinoma         | D1228N           | No                       | CD74-ROS1                |
| Known                 | #30*       | Lung Adenocarcinoma         | D1228N           | No                       | KLC4-ALK fusion          |
| Known                 | #31        | Lung Adenocarcinoma         | D1228N           | No                       | CD74-ROS1                |
| Known                 | #32        | Lung Adenocarcinoma         | D1228N           | No                       | EGFR L858R               |
| Known                 | #33        | Lung Adenocarcinoma         | H1094R           | No                       | KRAS Q61H                |
| Known                 | #34        | Lung Adenocarcinoma         | H1094Y           | <i>MET</i> amplified     | EGFR exon 19 deletion    |
| Known                 | #35        | Lung Adenocarcinoma         | H1094Y           | No                       | No                       |
| Known                 | #36        | Lung Adenocarcinoma         | H1094Y           | No                       | EGFR exon 19 deletion    |
| Known                 | #37        | Lung Adenocarcinoma         | H1094Y           | No                       | EGFR exon 19 deletion    |
| Known                 | #38        | Lung Adenocarcinoma         | H1094Y           | No                       | KRAS G12A                |
| Known                 | #39        | Poorly Differentiated NSCLC | H1094Y           | No                       | No                       |
| Known                 | #40        | Lung Adenocarcinoma         | L1195V           | <i>MET</i> amplified     | EGFR exon 19 deletion    |
| Known                 | #41        | Lung Adenocarcinoma         | L1195V           | No                       | No                       |
| Known                 | #42        | Lung Adenocarcinoma         | N1100S           | No                       | No                       |
| Known                 | #43        | Lung Adenocarcinoma         | Y1230C, D1228N   | <i>MET</i> amplified     | EGFR exon 19 deletion    |
| Known                 | #44        | Lung Adenocarcinoma         | Y1230C, Y1230H   | <i>MET</i> amplified     | EGFR exon 19 deletion    |

In red: cases with *MET* TKD mutations detected *de-novo*

In blue: cases with *MET* TKD mutations detected after *MET* TKIs

In green: cases with *MET* TKD mutations detected after *EGFR* TKIs

In purple: cases with *MET* TKD mutations detected after *ROS1* TKIs

\*Not available NGS at baseline therefore was not possible to understand whether MET D1228N arose after ALK TKIs or was present *de-novo* (Patient ID: #30)
