# Supplementary material for: Activating Point Mutations in the MET Kinase Domain Represent a Unique Molecular Subset of Lung Cancer and Other Malignancies Targetable with MET Inhibitors
Source: PubMed Central journal article supplement — Cancer Discov. 2024 Apr 2;14(8):1440–56. doi: 10.1158/2159-8290.CD-23-1217 (PMC11294820; doi:10.1158/2159-8290.cd-23-1217), 2024-04-02
Supplement: cd-23-1217_supplementary_table_12_suppst12.pdf [file cd-23-1217_supplementary_table_12_suppst12.pdf]

**Supplementary Table 12.** Characteristics of 129 NSCLC cases harboring oncogenic / likely oncogenic *MET* TKD mutations from cohort #2.

| <b>Characteristic</b>   | <b>Total<br/>(N=129)</b> |
|-------------------------|--------------------------|
| <b>Age</b>              |                          |
| Median (range)          | 69 (36-89+)              |
| <b>Sex</b>              |                          |
| Female                  | 56 (43.4%)               |
| Male                    | 73 (56.6%)               |
| <b>Ancestry</b>         |                          |
| EUR                     | 96 (74.3%)               |
| AFR                     | 13 (10.1%)               |
| AMR                     | 10 (7.8%)                |
| EAS                     | 8 (6.2%)                 |
| SAS                     | 2 (1.6%)                 |
| <b>Histology</b>        |                          |
| Adenocarcinoma          | 86 (66.7%)               |
| Squamous Cell Carcinoma | 10 (7.8%)                |
| NOS*                    | 31 (24.0%)               |
| Other                   | 2 (1.6%)                 |

Abbreviations: EUR, european continental ancestry group; AFR, african continental ancestry group; AMR, admixed american; EAS, east asian continental ancestry group; SAS, south asian continental ancestry group; NOS, not otherwise specified.

\* NOS includes liquid biopsy cases where tissue was not available for review
