# Supplementary material for: Activating Point Mutations in the MET Kinase Domain Represent a Unique Molecular Subset of Lung Cancer and Other Malignancies Targetable with MET Inhibitors
Source: PubMed Central journal article supplement — Cancer Discov. 2024 Apr 2;14(8):1440–56. doi: 10.1158/2159-8290.CD-23-1217 (PMC11294820; doi:10.1158/2159-8290.cd-23-1217), 2024-04-02
Supplement: cd-23-1217_supplementary_table_13_suppst13.pdf [file cd-23-1217_supplementary_table_13_suppst13.pdf]

**Supplementary Table 13.** Concurrent driver mutations according to oncogenic / likely oncogenic *MET* TKD mutations detected in cohort #2.

| MET Kinase Domain Mutation | No concurrent driver mutations present (N=78) | Concurrent <i>KRAS</i> mutation (N=33) | Concurrent <i>EGFR</i> mutation (N=11) | Concurrent <i>ROS1</i> Fusion (N=3) | Concurrent <i>ALK</i> Fusion (N=2) | Concurrent <i>BRAF</i> mutation (N=2) | Concurrent <i>MET</i> amplification (N=13) |
|----------------------------|-----------------------------------------------|----------------------------------------|----------------------------------------|-------------------------------------|------------------------------------|---------------------------------------|--------------------------------------------|
| H1094X                     | 25 (19.0%)                                    | 14 (10.5%)                             | 6 (4.7%)                               | 0                                   | 0                                  | 1 (0.8%)                              | 3 (2.3%)                                   |
| L1195X                     | 18 (14.0%)                                    | 5 (3.9%)                               | 1 (0.8%)                               | 0                                   | 0                                  | 1 (0.8%)                              | 3 (2.3%)                                   |
| D1228X                     | 9 (7%)                                        | 4 (3.1%)                               | 2 (1.5%)                               | 2 (1.5%)                            | 2 (1.5%)                           | 0                                     | 5 (3.8%)                                   |
| Y1230X                     | 9 (7%)                                        | 2 (1.5%)                               | 0                                      | 1 (0.8%)                            | 0                                  | 0                                     | 0                                          |
| H1106X                     | 5 (3.9%)                                      | 2 (1.5%)                               | 0                                      | 0                                   | 0                                  | 0                                     | 1 (0.8%)                                   |
| M1250X                     | 3 (2.4%)                                      | 3 (2.3%)                               | 0                                      | 0                                   | 0                                  | 0                                     | 0                                          |
| F1080X                     | 0                                             | 1 (0.8%)                               | 2 (1.5%)                               | 0                                   | 0                                  | 0                                     | 0                                          |
| V1092X                     | 3 (2.4%)                                      | 1 (0.8%)                               | 0                                      | 0                                   | 0                                  | 0                                     | 1 (0.8%)                                   |
| V1220X                     | 3 (2.4%)                                      | 0                                      | 0                                      | 0                                   | 0                                  | 0                                     | 0                                          |
| F1200X                     | 1 (0.8%)                                      | 1 (0.8%)                               | 0                                      | 0                                   | 0                                  | 0                                     | 0                                          |
| N1100T                     | 1 (0.8%)                                      | 0                                      | 0                                      | 0                                   | 0                                  | 0                                     | 0                                          |
| Y1235H                     | 1 (0.8%)                                      | 0                                      | 0                                      | 0                                   | 0                                  | 0                                     | 0                                          |

\*Percentages are calculated considering the total number of cases (N=129) as denominator.
