# Supplementary material for: Activating Point Mutations in the MET Kinase Domain Represent a Unique Molecular Subset of Lung Cancer and Other Malignancies Targetable with MET Inhibitors
Source: PubMed Central journal article supplement — Cancer Discov. 2024 Apr 2;14(8):1440–56. doi: 10.1158/2159-8290.CD-23-1217 (PMC11294820; doi:10.1158/2159-8290.cd-23-1217), 2024-04-02
Supplement: cd-23-1217_supplementary_table_14_suppst14.pdf [file cd-23-1217_supplementary_table_14_suppst14.pdf]

**Supplementary Table 14.** Concurrent genomic drivers in cases with oncogenic / likely oncogenic *MET* tyrosine kinase domain (TKD) mutations and co-occurring *MET* gene amplification in cohort #2.

| Patient | <i>MET</i> TKD mutation | <i>MET</i> gene copies | Concurrent driver        |
|---------|-------------------------|------------------------|--------------------------|
| FMI_1   | D1228H                  | 22                     | <i>EML4-ALK</i> fusion   |
| FMI_2   | D1228N                  | 26                     | <i>ALK</i> rearrangement |
| FMI_3   | D1228N                  | 7                      | None                     |
| FMI_4   | D1228N                  | 9                      | None                     |
| FMI_5   | D1228N                  | 7                      | <i>KRAS</i> G12A         |
| FMI_6   | H1094Y                  | 34                     | <i>EGFR</i> L858R        |
| FMI_7   | H1094Y                  | 8                      | None                     |
| FMI_8   | H1094Y                  | 8                      | <i>KRAS</i> G12A         |
| FMI_9   | L1195F                  | 8                      | None                     |
| FMI_10  | L1195V                  | 8                      | None                     |
| FMI_11  | L1195V                  | 11                     | None                     |
| FMI_12  | V1092I                  | 30                     | None                     |
| FMI_13  | H1106D                  | 10                     | None                     |
