# Supplementary material for: Activating Point Mutations in the MET Kinase Domain Represent a Unique Molecular Subset of Lung Cancer and Other Malignancies Targetable with MET Inhibitors
Source: PubMed Central journal article supplement — Cancer Discov. 2024 Apr 2;14(8):1440–56. doi: 10.1158/2159-8290.CD-23-1217 (PMC11294820; doi:10.1158/2159-8290.cd-23-1217), 2024-04-02
Supplement: cd-23-1217_supplementary_table_15_suppst15.pdf [file cd-23-1217_supplementary_table_15_suppst15.pdf]

**Supplementary Table 15.** Comparison between clinicopathologic characteristic of NSCLCs with oncogenic / likely oncogenic *MET* tyrosine kinase domain (TKD) mutations as a *de novo* genomic event to NSCLCs with *MET* exon 14 alterations in cohort #1.

|                                            | <b><i>MET</i> TKD mutant NSCLC* (N=13)</b> | <b><i>MET</i> exon 14 altered NSCLC** (N=123)</b> | <b>P</b>          |
|--------------------------------------------|--------------------------------------------|---------------------------------------------------|-------------------|
| <b>Age</b>                                 |                                            |                                                   |                   |
| Median (range)                             | 74.0 (34.0-88.0)                           | 73.0 (43.0-95.0)                                  | 0.8               |
| <b>Sex</b>                                 |                                            |                                                   |                   |
| Female                                     | 8 (61.5%)                                  | 76 (61.8%)                                        | 1                 |
| Male                                       | 5 (38.5%)                                  | 47 (38.2%)                                        |                   |
| <b>Race</b>                                |                                            |                                                   |                   |
| White                                      | 13 (100%)                                  | 115 (93.5%)                                       | 0.6               |
| Asian                                      | 0 (0%)                                     | 2 (1.5%)                                          |                   |
| Other/Unknown                              | 0 (0%)                                     | 6 (5.0%)                                          |                   |
| <b>Smoking status</b>                      |                                            |                                                   |                   |
| Former Smoker                              | 13 (100%)                                  | 63 (51.2%)                                        | <b>0.003</b>      |
| Current Smoker                             | 0 (0%)                                     | 8 (6.5%)                                          |                   |
| Never Smoker                               | 0 (0%)                                     | 52 (42.3%)                                        |                   |
| <b>Tobacco Pack-Years</b>                  |                                            |                                                   |                   |
| Median (range)                             | 24.0 (7.0-80.0)                            | 21.5 (2.0-125)                                    | 0.7               |
| <b>Histology</b>                           |                                            |                                                   |                   |
| Adenocarcinoma                             | 10 (76.9%)                                 | 95 (77.2%)                                        | 0.9               |
| Squamous Cell Carcinoma                    | 1 (7.6%)                                   | 6 (4.9%)                                          |                   |
| Other                                      | 2 (15.5%)                                  | 22 (17.9%)                                        |                   |
| <b>PD-L1 TPS</b>                           |                                            |                                                   |                   |
| <1%                                        | 2 (25.0%)                                  | 8 (14.5%)                                         | 0.7               |
| 1-49%                                      | 2 (25.0%)                                  | 20 (36.4%)                                        |                   |
| ≥50%                                       | 4 (50.0%)                                  | 27 (49.1%)                                        |                   |
| NA                                         | 5                                          | 68                                                |                   |
| <b>Concurrent <i>MET</i> Amplification</b> |                                            |                                                   |                   |
| Yes                                        | 1 (7.6%)                                   | 12 (9.8%)                                         | 0.9               |
| No                                         | 12 (92.4%)                                 | 111 (90.2%)                                       |                   |
| <b>Harmonized TMB z-score</b>              |                                            |                                                   |                   |
| Median (range)                             | 0.59 <sup>†</sup> (-0.74-3.30)             | -0.58 <sup>‡</sup> (-3.64-1.94)                   | <b>&lt; 0.001</b> |

Abbreviations: TMB, tumor mutation burden; TPS, tumor proportion score; NA, not available.

\* *MET* TKD mutant NSCLC from DFCI and MSKCC

\*\* *MET* exon 14 altered NSCLC (N=123) only from DFCI

<sup>†</sup> TMB z-score of 0.59 corresponds to TMB 13.6 mut/Mb on the DFCI OncoPanel platform and TMB 9.9 mut/Mb on the MSK-IMPACT platform.

<sup>‡</sup> TMB z-score of -0.58 corresponds to TMB 6.05 mut/Mb on the DFCI OncoPanel platform.
