# Supplementary material for: Activating Point Mutations in the MET Kinase Domain Represent a Unique Molecular Subset of Lung Cancer and Other Malignancies Targetable with MET Inhibitors
Source: PubMed Central journal article supplement — Cancer Discov. 2024 Apr 2;14(8):1440–56. doi: 10.1158/2159-8290.CD-23-1217 (PMC11294820; doi:10.1158/2159-8290.cd-23-1217), 2024-04-02
Supplement: cd-23-1217_supplementary_table_16_suppst16.pdf [file cd-23-1217_supplementary_table_16_suppst16.pdf]

**Supplementary Table 16.** Comparison between clinicopathologic characteristic of NSCLCs with oncogenic / likely oncogenic *MET* tyrosine kinase domain (TKD) mutations without concurrent other drivers to NSCLCs with *MET* exon 14 alterations in cohort #2.

|                                            | <b><i>MET</i> TKD mutant NSCLC (N=78)</b> | <b><i>MET</i> exon 14 altered NSCLC (N=2,036)</b> | <b>P</b>           |
|--------------------------------------------|-------------------------------------------|---------------------------------------------------|--------------------|
| <b>Age</b>                                 |                                           |                                                   |                    |
| Median (range)                             | 70 (36-89+)                               | 76 (41-89+)                                       | <b>&lt; 0.0001</b> |
| <b>Sex</b>                                 |                                           |                                                   |                    |
| Female                                     | 23 (29.0%)                                | 1140 (56.0%)                                      | <b>&lt; 0.0001</b> |
| Male                                       | 55 (71.0%)                                | 896 (44.0%)                                       |                    |
| <b>Ancestry<sup>#</sup></b>                |                                           |                                                   |                    |
| EUR                                        | 56 (72.0%)                                | 1,658 (81.5%)                                     | <b>0.005</b>       |
| AFR                                        | 12 (15.0%)                                | 132 (6.5%)                                        |                    |
| AMR                                        | 8 (10.0%)                                 | 134 (6.4%)                                        |                    |
| EAS                                        | 1 (1.5%)                                  | 102 (5.1%)                                        |                    |
| SAS                                        | 1 (1.5%)                                  | 8 (0.5%)                                          |                    |
| NA                                         | 0                                         | 2                                                 |                    |
| <b>Histology</b>                           |                                           |                                                   |                    |
| Adenocarcinoma                             | 49 (63.0%)                                | 1,288 (63.0%)                                     | <b>0.6</b>         |
| Squamous Cell Carcinoma                    | 8 (10.0%)                                 | 286 (14.0%)                                       |                    |
| NOS*                                       | 19 (24.0%)                                | 399 (20.0%)                                       |                    |
| Other                                      | 2 (3.0%)                                  | 63 (3.0%)                                         |                    |
| <b>PD-L1 TPS</b>                           |                                           |                                                   |                    |
| <1%                                        | 5 (14.0%)                                 | 116 (14.0%)                                       | <b>0.4</b>         |
| 1-49%                                      | 5 (14.0%)                                 | 194 (23.0%)                                       |                    |
| ≥50%                                       | 26 (72.0%)                                | 526 (63.0%)                                       |                    |
| NA                                         | 42                                        | 1200                                              |                    |
| <b>Concurrent <i>MET</i> amplification</b> |                                           |                                                   |                    |
| Yes                                        | 8 (10.0%)                                 | 228 (11.0%)                                       | <b>1.0</b>         |
| No                                         | 70 (90.0%)                                | 1811 (89.0%)                                      |                    |
| <b>TMB mut/Mb</b>                          |                                           |                                                   |                    |
| Median (range)                             | 9.8 (0-131)                               | 3.8 (0-80)                                        | <b>&lt; 0.0001</b> |

Abbreviations: TMB, tumor mutation burden; TPS, tumor proportion score; NA, not available.

<sup>#</sup> Ancestry was available for N=2,034 patients with METex14-altered NSCLC. AFR, african continental ancestry group; AMR, admixed American; EAS, east asian continental ancestry group; EUR, european continental ancestry group; SAS, south asian.

\* NOS includes liquid biopsy cases where tissue was not available for review
