# Supplementary material for: Activating Point Mutations in the MET Kinase Domain Represent a Unique Molecular Subset of Lung Cancer and Other Malignancies Targetable with MET Inhibitors
Source: PubMed Central journal article supplement — Cancer Discov. 2024 Apr 2;14(8):1440–56. doi: 10.1158/2159-8290.CD-23-1217 (PMC11294820; doi:10.1158/2159-8290.cd-23-1217), 2024-04-02
Supplement: cd-23-1217_supplementary_table_17_suppst17.pdf [file cd-23-1217_supplementary_table_17_suppst17.pdf]

**Supplementary Table 17.** Comparison of clinicopathologic characteristics between NSCLCs with oncogenic / likely oncogenic *MET* tyrosine kinase domain (TKD) mutations without other concurrent drivers and NSCLCs with *MET* exon 14 alterations in the Caris Life Sciences cohort.

| Characteristics                           | <i>MET</i> TKD mutant NSCLC (N=15) | <i>MET</i> exon 14 altered NSCLC (N=682) | p                  |
|-------------------------------------------|------------------------------------|------------------------------------------|--------------------|
| <b>Age</b>                                |                                    |                                          |                    |
| Median (range)                            | 73 (57-83)                         | 77 (40-89+)                              | <b>0.006</b>       |
| <b>Sex</b>                                |                                    |                                          |                    |
| Male                                      | 10 (66.7%)                         | 301 (44.1%)                              | 0.08               |
| Female                                    | 5 (33.3%)                          | 381 (55.9%)                              |                    |
| <b>Smoking status</b>                     |                                    |                                          |                    |
| Current / Former                          | 6 (100%)                           | 104 (88.1%)                              | 1                  |
| Never                                     | 0 (0%)                             | 14 (11.9%)                               |                    |
| NA                                        | 9                                  | 564                                      |                    |
| <b>Histology</b>                          |                                    |                                          |                    |
| Adenocarcinoma                            | 8 (53.3%)                          | 425 (62.3%)                              | 0.9                |
| Squamous Cell Carcinoma                   | 2 (13.3%)                          | 78 (11.4%)                               |                    |
| Adenosquamous                             | 1 (6.7%)                           | 25 (3.7%)                                |                    |
| Sarcomatoid                               | 0 (0.0%)                           | 24 (3.5%)                                |                    |
| Large Cell Carcinoma                      | 0 (0.0%)                           | 1 (0.1%)                                 |                    |
| Other/Unclear Histology                   | 4 (26.7%)                          | 129 (18.9%)                              |                    |
| <b>PD-L1 TPS</b>                          |                                    |                                          |                    |
| < 1%                                      | 5 (35.7%)                          | 127 (19.3%)                              | 0.1                |
| 1-49%                                     | 1 (7.2%)                           | 190 (28.9%)                              |                    |
| ≥ 50%                                     | 8 (57.1%)                          | 341 (51.8%)                              |                    |
| NA                                        | 1                                  | 24                                       |                    |
| <b>Concurred <i>MET</i> amplification</b> |                                    |                                          |                    |
| Yes                                       | 1 (6.6%)                           | 20 (2.9%)                                | 0.37               |
| No                                        | 14 (93.4%)                         | 662 (97.1%)                              |                    |
| <b>TMB mut/Mb*</b>                        |                                    |                                          |                    |
| Median (range)                            | 12.5 (1-27)                        | 4 (0-24)                                 | <b>&lt; 0.0001</b> |

Abbreviations: TMB, tumor mutation burden; TPS, tumor proportion score; NA, not available.

\*5 cases had TMB <5 , 7 cases had 10 <TMB< 20, 2 cases had TMB > 20, in 1 case TMB was not available.
