# Supplementary material for: Activating Point Mutations in the MET Kinase Domain Represent a Unique Molecular Subset of Lung Cancer and Other Malignancies Targetable with MET Inhibitors
Source: PubMed Central journal article supplement — Cancer Discov. 2024 Apr 2;14(8):1440–56. doi: 10.1158/2159-8290.CD-23-1217 (PMC11294820; doi:10.1158/2159-8290.cd-23-1217), 2024-04-02
Supplement: cd-23-1217_supplementary_table_19_suppst19.pdf [file cd-23-1217_supplementary_table_19_suppst19.pdf]

**Supplementary Table 19.** Detailed clinicopathologic and genomic characteristics related to renal cell cancer cases in cohort #1

| <b>Clinicopathologic characteristics</b>   | <b>Total (N=34)</b> |
|--------------------------------------------|---------------------|
| <b>Age</b>                                 |                     |
| Median (range)                             | 61.5 (29-80)        |
| <b>Sex</b>                                 |                     |
| Female                                     | 8 (23.5%)           |
| Male                                       | 26 (76.5%)          |
| <b>Race</b>                                |                     |
| White                                      | 24 (77.4%)          |
| Asian                                      | 1 (3.3%)            |
| Black                                      | 6 (19.3%)           |
| NA                                         | 3                   |
| <b>Detailed Histology</b>                  |                     |
| PRCC                                       | 29 (85.3%)          |
| Not PRCC                                   | 5 (14.7%)           |
| <b>TMB</b>                                 |                     |
| <10 mut/Mb                                 | 21 (95.5%)          |
| 10-20 mut/Mb                               | 1 (4.5%)            |
| >20 mut/Mb                                 | 0                   |
| NA                                         | 12                  |
| <b>MSI genotype</b>                        |                     |
| Deficient                                  | 0                   |
| Proficient                                 | 21 (100%)           |
| NA                                         | 13                  |
| <b>Concurrent <i>MET</i> amplification</b> |                     |
| Yes                                        | 1 (3.1%)            |
| No                                         | 31 (96.9%)          |
| NA                                         | 2                   |

Abbreviations: PRCC, papillary renal cell carcinoma; MSI, microsatellite instability; TMB, tumor mutational burden; NA, not available.

In cohort #1 median TMB was not assessed due to the heterogeneity of NGS platform across the dataset included.
