# Supplementary material for: Activating Point Mutations in the MET Kinase Domain Represent a Unique Molecular Subset of Lung Cancer and Other Malignancies Targetable with MET Inhibitors
Source: PubMed Central journal article supplement — Cancer Discov. 2024 Apr 2;14(8):1440–56. doi: 10.1158/2159-8290.CD-23-1217 (PMC11294820; doi:10.1158/2159-8290.cd-23-1217), 2024-04-02
Supplement: cd-23-1217_supplementary_table_20_suppst20.pdf [file cd-23-1217_supplementary_table_20_suppst20.pdf]

**Supplementary Table 20.** Clinicopathologic and genomic characteristics of 171 cases of cancers other than NSCLC harboring oncogenic / likely oncogenic *MET* TKD mutations in cohort #2.

| Characteristic                             | Total (N=171) |
|--------------------------------------------|---------------|
| <b>Age</b>                                 |               |
| Median (range)                             | 63 (35-89+)   |
| <b>Sex</b>                                 |               |
| Female                                     | 50 (29.0%)    |
| Male                                       | 121 (71.0%)   |
| <b>Ancestry (%)</b>                        |               |
| EUR                                        | 125 (73.0%)   |
| AFR                                        | 29 (17.0%)    |
| AMR                                        | 10 (5.8%)     |
| EAS                                        | 5 (2.9%)      |
| SAS                                        | 2 (1.2%)      |
| <b>Tumor type (%)</b>                      |               |
| Renal*                                     | 57 (33.0%)    |
| CUP                                        | 21 (12.0%)    |
| Melanoma                                   | 18 (11.0%)    |
| Colorectal                                 | 9 (5.3%)      |
| Pancreatic                                 | 8 (4.7%)      |
| Bladder                                    | 7 (4.1%)      |
| Uterine (Endometrial)                      | 6 (3.5%)      |
| Stomach                                    | 5 (2.9%)      |
| Esophagus                                  | 5 (2.9%)      |
| Ovarian                                    | 5 (2.9%)      |
| Other (<5 each)**                          | 30 (18.0%)    |
| <b>TMB</b>                                 |               |
| Median (range)                             | 5.0 (0-734)   |
| <b>TMB value</b>                           |               |
| <10 mut/Mb                                 | 111 (65.0%)   |
| 10-20 mut/Mb                               | 14 (12.6%)    |
| >20 mut/Mb                                 | 46 (22.4%)    |
| <b>MSI genotype</b>                        |               |
| Deficient                                  | 12 (7.6%)     |
| Proficient                                 | 146 (92.4%)   |
| NA                                         | 13            |
| <b>Concurrent <i>MET</i> amplification</b> |               |
| Yes                                        | 7 (4.1%)      |
| No                                         | 164 (95.9%)   |

Abbreviations: CUP, cancer of unknown primary; MSI: microsatellite instability; TMB, tumor mutational burden; NA, not available.

For Ancestry: AFR, african continental ancestry group; EAS, east Asian continental ancestry group; EUR, european continental ancestry group; SAS, south asian continental ancestry group, AMR, admixed american.

No tumors showed concurrent RET fusion, NTRK fusion detected in 1 case (0.6%).

\*Among 57 renal cancer cases, 33 (58%) are papillary renal cell carcinoma.

\*\*Other: Head and neck (N=4), Prostate (N=4), Small intestine (N=3), Small cell (NOS) (N=3), Breast (N=3), Lung underspecified (N=2), Skin (other than melanoma) (N=1), Uterine (other than endometrial) (N=1), Anus (N=1), Glioma (N=1), Salivary gland (N=1), Endocrine (N=1), Gallbladder (N=1), Cervix (N=1), Neuroendocrine (N=1), Liver (N=1), Adenoid cystic carcinoma (N=1).
