# Supplementary material for: Activating Point Mutations in the MET Kinase Domain Represent a Unique Molecular Subset of Lung Cancer and Other Malignancies Targetable with MET Inhibitors
Source: PubMed Central journal article supplement — Cancer Discov. 2024 Apr 2;14(8):1440–56. doi: 10.1158/2159-8290.CD-23-1217 (PMC11294820; doi:10.1158/2159-8290.cd-23-1217), 2024-04-02
Supplement: cd-23-1217_supplementary_table_21_suppst21.pdf [file cd-23-1217_supplementary_table_21_suppst21.pdf]

**Supplementary Table 21.** Detailed clinicopathologic and genomic characteristics related to renal cell cancer cases in cohort #2.

| <b>Clinicopathologic characteristics</b>   | <b>Total<br/>(N=57)</b> |
|--------------------------------------------|-------------------------|
| <b>Age</b>                                 |                         |
| Median (range)                             | 63 (35-76)              |
| <b>Sex</b>                                 |                         |
| Female                                     | 6 (11%)                 |
| Male                                       | 51 (89%)                |
| <b>Ancestry</b>                            |                         |
| EUR                                        | 38 (67%)                |
| AFR                                        | 15 (26%)                |
| AMR                                        | 3 (5.3%)                |
| EAS                                        | 0 (0%)                  |
| SAS                                        | 1 (1.8%)                |
| <b>Detailed Histology</b>                  |                         |
| PRCC                                       | 33 (58%)                |
| Not PRCC                                   | 24 (42%)                |
| <b>TMB</b>                                 |                         |
| Median (range) (mut/Mb)                    | 2.5 (0-8.7)             |
| <b>TMB</b>                                 |                         |
| <10 mut/Mb                                 | 57 (100%)               |
| 10-20 mut/Mb                               | 0 (0%)                  |
| >20 mut/Mb                                 | 0 (0%)                  |
| <b>MSI genotype</b>                        |                         |
| Deficient                                  | 0 (0%)                  |
| Proficient                                 | 54 (100%)               |
| NA                                         | 3                       |
| <b>Concurrent <i>MET</i> amplification</b> |                         |
| Yes                                        | 2 (3.5%)                |
| No                                         | 55 (96%)                |

Abbreviations: PRCC: papillary renal cell carcinoma; MSI: microsatellite instability; TMB, tumor mutational burden; NA, not available.

For Ancestry: AFR, african continental ancestry group; EAS, east asian continental ancestry group; EUR, european continental ancestry group; SAS, south asian continental ancestry group, AMR, admixed american.
