# Supplementary material for: Activating Point Mutations in the MET Kinase Domain Represent a Unique Molecular Subset of Lung Cancer and Other Malignancies Targetable with MET Inhibitors
Source: PubMed Central journal article supplement — Cancer Discov. 2024 Apr 2;14(8):1440–56. doi: 10.1158/2159-8290.CD-23-1217 (PMC11294820; doi:10.1158/2159-8290.cd-23-1217), 2024-04-02
Supplement: cd-23-1217_supplementary_table_22_suppst22.pdf [file cd-23-1217_supplementary_table_22_suppst22.pdf]

**Supplementary Table 22.** Oncogenic / likely oncogenic *MET* TKD mutations in RCC compared to those detected in NSCLC in cohort #1.

| <b>MET residue</b> | <b>MET TKD mutations in RCC<br/>(N=35)</b> | <b>MET TKD mutations in NSCLC<br/>(N=47)</b> | <b>P</b>     |
|--------------------|--------------------------------------------|----------------------------------------------|--------------|
| H1094X             | 5 (14.3%)                                  | 13 (27.7%)                                   | 0.11         |
| Y1230X             | 10 (28.6%)                                 | 7 (14.9%)                                    | 0.17         |
| M1250X             | 8 (22.9%)                                  | 1 (2.1%)                                     | <b>0.004</b> |
| D1228X             | 1(2.9%)                                    | 16 (34.1%)                                   | <b>0.006</b> |
| V1092X             | 4 (11.4%)                                  | 0                                            | -            |
| F1200X             | 3 (8.6%)                                   | 1 (2.1%)                                     | -            |
| V1220X             | 1 (2.9%)                                   | 3 (6.4%)                                     | -            |
| H1106X             | 0                                          | 1 (2.1%)                                     | -            |
| L1195X             | 3 (8.4%)                                   | 2 (4.3%)                                     | -            |
| V1188X             | 0                                          | 1 (2.1%)                                     | -            |
| N1100X             | 0                                          | 1 (2.1%)                                     | -            |
| H1235X             | 0                                          | 1 (2.1%)                                     | -            |

Abbreviations: NSCLC, non-small cell lung cancer; RCC, renal cell carcinoma.

Fisher test was performed only when were present at least 5 cases harboring the specific *MET* TKD mutation in at least one of the tumor type (NSCLC or RCC) compared.
