# Supplementary material for: Activating Point Mutations in the MET Kinase Domain Represent a Unique Molecular Subset of Lung Cancer and Other Malignancies Targetable with MET Inhibitors
Source: PubMed Central journal article supplement — Cancer Discov. 2024 Apr 2;14(8):1440–56. doi: 10.1158/2159-8290.CD-23-1217 (PMC11294820; doi:10.1158/2159-8290.cd-23-1217), 2024-04-02
Supplement: cd-23-1217_supplementary_table_24_suppst24.pdf [file cd-23-1217_supplementary_table_24_suppst24.pdf]

**Supplementary Table 24.** Single trajectory generalized Born and surface area solvation (MM/GBSA) calculated free energy of ATP binding into the orthosteric pocket.

| <b>System</b>         | <b>Average</b> | <b>Std. Dev.</b> | <b>Std Err. Of Mean</b> |
|-----------------------|----------------|------------------|-------------------------|
| <b>cMet Wild Type</b> | -90.42         | 11.73            | 0.52                    |
| <b>cMet H1094Y*</b>   | -126.24        | 10.85            | 0.46                    |
| <b>cMet F1200I*</b>   | -121.86        | 12.93            | 0.75                    |
| <b>cMet R1170Q*</b>   | -134.89        | 12.37            | 1.23                    |

Units of energy are reported in kcal/mole.

\* indicated P values < 0.01 using a two independent sample t-test.
