# Supplementary material for: Activating Point Mutations in the MET Kinase Domain Represent a Unique Molecular Subset of Lung Cancer and Other Malignancies Targetable with MET Inhibitors
Source: PubMed Central journal article supplement — Cancer Discov. 2024 Apr 2;14(8):1440–56. doi: 10.1158/2159-8290.CD-23-1217 (PMC11294820; doi:10.1158/2159-8290.cd-23-1217), 2024-04-02
Supplement: cd-23-1217_supplementary_table_25_suppst25.pdf [file cd-23-1217_supplementary_table_25_suppst25.pdf]

**Supplementary Table 25.** TCGA PanCancer Atlas Studies included in cohort #1 downloaded from cBioPortal.

| <b>TCGA Pan-Cancer Atlas Studies</b>  |
|---------------------------------------|
| Adrenocortical Carcinoma              |
| Cholangiocarcinoma                    |
| Bladder Urothelial Carcinoma          |
| Colorectal Adenocarcinoma             |
| Breast Invasive Carcinoma             |
| Brain Lower Grade Glioma              |
| Glioblastoma Multiforme               |
| Cervical Squamous Cell Carcinoma      |
| Esophageal Adenocarcinoma             |
| Stomach Adenocarcinoma                |
| Uveal Melanoma                        |
| Head and Neck Squamous Cell Carcinoma |
| Kidney Renal Clear Cell Carcinoma     |
| Kidney Chromophobe                    |
| Kidney Renal Papillary Cell Carcinoma |
| Liver Hepatocellular Carcinoma        |
| Lung Adenocarcinoma                   |
| Lung Squamous Cell Carcinoma          |
| Diffuse Large B-Cell Lymphoma         |
| Acute Myeloid Leukemia                |
| Ovarian Serous Cystadenocarcinoma     |
| Pancreatic Adenocarcinoma             |
| Mesothelioma                          |
| Prostate Adenocarcinoma               |
| Skin Cutaneous Melanoma               |
| Pheochromocytoma and Paraganglioma    |
| Sarcoma                               |
| Testicular Germ Cell Tumors           |
| Thymoma                               |
| Thyroid Carcinoma                     |
| Uterine Corpus Endometrial Carcinoma  |
| Uterine Carcinosarcoma                |
