# Supplementary material for: Activating Point Mutations in the MET Kinase Domain Represent a Unique Molecular Subset of Lung Cancer and Other Malignancies Targetable with MET Inhibitors
Source: PubMed Central journal article supplement — Cancer Discov. 2024 Apr 2;14(8):1440–56. doi: 10.1158/2159-8290.CD-23-1217 (PMC11294820; doi:10.1158/2159-8290.cd-23-1217), 2024-04-02
Supplement: cd-23-1217_supplementary_table_26_suppst26.pdf [file cd-23-1217_supplementary_table_26_suppst26.pdf]

**Supplementary Table 26.** Mutagenic primers used for mutagenesis.

| Mutation      | Forward                                          | Reverse                                        |
|---------------|--------------------------------------------------|------------------------------------------------|
| <b>N1081S</b> | CCCAGTAGCCTGATTGTGCATTTTCAGTGAAGTCATAGGA         | TCCTATGACTTCACTGAAATGCACAATCAGGCTACTGGG        |
| <b>V1092I</b> | GAAGAGGGCATTGTTGGTTGTATATATCATGGGACTTTGTTG       | CAACAAAGTCCCATGATATATACAACCAAATGCCCTCTTC       |
| <b>H1094Y</b> | AGAGGGCATTGTTGGTTGTATATTATGGGACTTTGTTGG          | CCAACAAAGTCCCATATAATACACAACCAAATGCCCTCT        |
| <b>N1100S</b> | GTGTATATCATGGGACTTTGTTGGACAGTGTGGCAAGAAAA        | TTTTCTTGCCATCACTGTCCAACAAAGTCCCATGATATACAC     |
| <b>G1102D</b> | GACTTTGTTGGACAATGATGACAAGAAAATTCAGTGTGCTG        | CAGCACAGTGAATTTCTTGTGCATCATTGTCCAACAAAGTC      |
| <b>H1106D</b> | GTTGGACAATGATGGCAAGAAAATTCAGTGTGCTGTGAA          | TTCACAGCACAGTCAATTTTCTTGCCATCATTGTCCAAC        |
| <b>R1170Q</b> | TGGAGATCTTCGAAATTTTCATTCAAAATGAGACTCATAATCCAACGT | CAGTTGGATTATGAGTCTCATTTTGAATGAAATTCGAAGATCTCCA |
| <b>L1195V</b> | CTTCAAGTAGCCAAAGGCATGAAATATGTTGCAAGCAAAAAGTT     | AACTTTTGGCTTGCAACATATTTTCATGCCTTTGGCTACTTGAAG  |
| <b>F1200I</b> | ATATCTTGCAAGCAAAAAGATTGTCCACAGAGACTTGGC          | GCCAAGTCTCTGTGGACAATCTTTTGGCTTGCAAGATAT        |
| <b>D1228N</b> | GGTTGCTGATTTTGGTCTTGCCAGAAACATGTATGATAAAGAATAC   | GTATTCTTTATCATAATGTTTCTGGCAAGACCAAATCAGCAACC   |
| <b>M1229V</b> | TGATTTTGGTCTTGCCAGAGACGTGTATGATAAAGAATACTATAGT   | ACTATAGTATTCTTTATCATAACAGTCTCTGGCAAGACCAAATCA  |
| <b>Y1230H</b> | CAGAGACATGCATGATAAAGAATACTATAG                   | GCAAGACCAAATCAGCAAC                            |
| <b>M1250T</b> | AAAGCTGCCAGTGAAGTGGACGGCTTTGGAAAGT               | ACTTTCCAAAGCCGTCCACTTCACTGGCAGCTTT             |
| <b>R1327C</b> | ACCCTAAAGCCGAAATGTGCCATCCTTTTCTGAA               | TTCAGAAAAGGATGGGCACATTTGGCTTTAGGGT             |
| <b>I1345T</b> | ATCAGCGATCTTCTACTTTCACTGGGGAGCACTA               | TAGTGCTCCCCAGTGAAGTAGAGAAGATCGCTGAT            |

All mutations were introduced using the QuikChange Lightning or QuikChange II XL Site-Directed Mutagenesis Kit (Agilent Technologies; 210519 and 200521), with the exception of the Y1230H mutation, which was introduced using the Q5 Site-Directed Mutagenesis Kit (NEB; E0552S). All constructs were confirmed by DNA sequencing.
